# Supplementary material for: Membrane curvature regulates the spatial distribution of bulky glycoproteins
Source: PubMed Central journal article supplement (PMC9163104; doi:10.1038/s41467-022-30610-2), 2022-06-02
Supplement: 41467_2022_30610_MOESM1_ESM.pdf [file 41467_2022_30610_MOESM1_ESM.pdf]

Supplemental Information for

**Membrane curvature regulates the spatial distribution of bulky glycoproteins**

Chih-Hao Lu<sup>a</sup>, Kayvon Pedram<sup>a,b</sup>, Ching-Ting Tsai<sup>a</sup>, Taylor Jones IV<sup>a</sup>, Xiao Li<sup>a,c</sup>, Melissa Nakamoto<sup>a</sup>, Carolyn R. Bertozzi<sup>a,d,e</sup>, and Bianxiao Cui<sup>a,\*</sup>

<sup>a</sup>Department of Chemistry, Stanford University, Stanford, CA, USA, 94305

<sup>b</sup>Janelia Research Campus, Howard Hughes Medical Institute, VA, USA, 20147 (Current address)

<sup>c</sup>School of Mechanical Engineering, Xi'an Jiaotong University, Xi'an, China (Current address)

<sup>d</sup>Stanford ChEM-H, Stanford University, Stanford, CA, USA, 94305

<sup>e</sup>Howard Hughes Medical Institute, Stanford University, Stanford, USA, CA 94305

\* To whom should be addressed: Bianxiao Cui, E-mail: [bcui@stanford.edu](mailto:bcui@stanford.edu)

| Target                | Normalized nanobar end-to-side ratio - <b>U2OS</b> cells on <b>200-nm nanobars</b> |       |                          |                |                   | Corresponding figure |
|-----------------------|------------------------------------------------------------------------------------|-------|--------------------------|----------------|-------------------|----------------------|
|                       | Mean                                                                               | SD    | SEM<br>(SD/ $\sqrt{N}$ ) | N<br>(# cells) | n<br>(# nanobars) |                      |
| $\alpha$ -AP2         | 2.043                                                                              | 0.647 | 0.138                    | 22             | 290               | Fig. 1J              |
| F-actin               | 1.384                                                                              | 0.371 | 0.085                    | 19             | 157               |                      |
| CAAX                  | 1.000                                                                              | 0.038 | 0.003                    | 170            | 9092              |                      |
| MUC1 $\Delta$ CT-0TR  | 1.028                                                                              | 0.047 | 0.008                    | 38             | 1757              |                      |
| MUC1 $\Delta$ CT-10TR | 0.999                                                                              | 0.042 | 0.006                    | 50             | 2097              |                      |
| MUC1 $\Delta$ CT-21TR | 0.900                                                                              | 0.047 | 0.007                    | 48             | 2202              |                      |
| MUC1 $\Delta$ CT-42TR | 0.889                                                                              | 0.043 | 0.005                    | 63             | 3415              |                      |

**Supplementary Table 1. Statistical analysis of normalized nanobar end-to-side ratios on 200-nm nanobar arrays for U2OS cells.**



A

| Target         | Normalized pillar-to-cytosolic background ratio - HeLa cells on 200-nm nanopillars |       |                          |                |                      |                             |
|----------------|------------------------------------------------------------------------------------|-------|--------------------------|----------------|----------------------|-----------------------------|
|                | Mean                                                                               | SD    | SEM<br>(SD/ $\sqrt{N}$ ) | N<br>(# cells) | n<br>(# nanopillars) | Corresponding figure        |
| $\alpha$ -MUC1 | 0.899                                                                              | 0.188 | 0.036                    | 27             | 2705                 | Fig. 1N & Suppl.<br>Fig. 4C |
| CellMask       | 1.000                                                                              | 0.158 | 0.032                    | 25             | 3647                 |                             |
| $\alpha$ -AP2  | 1.624                                                                              | 0.315 | 0.067                    | 22             | 1734                 | Fig. 1N                     |
| F-actin        | 1.250                                                                              | 0.159 | 0.046                    | 12             | 2943                 | Suppl. Fig. 4C              |

B

| Target                       | Normalized pillar-to-cytosolic background ratio - U2OS cells on 200-nm nanopillars |        |                          |                |                      |                                     |
|------------------------------|------------------------------------------------------------------------------------|--------|--------------------------|----------------|----------------------|-------------------------------------|
|                              | Mean                                                                               | SD     | SEM<br>(SD/ $\sqrt{N}$ ) | N<br>(# cells) | n<br>(# nanopillars) | Corresponding figure                |
| MUC1 $\Delta$ CT-42TR        | 0.807                                                                              | 0.102  | 0.025                    | 16             | 1576                 | Fig. 1O, 4G, 4I &<br>Suppl. Fig. 5E |
| MUC1 $\Delta$ CT-0TR         | 1.148                                                                              | 0.209  | 0.044                    | 23             | 1853                 | Fig. 1O                             |
| CAAX                         | 1.000                                                                              | 0.196  | 0.026                    | 59             | 5720                 | Fig. 1O, 4G, 4I &<br>Suppl. Fig. 5E |
| MUC1 $\Delta$ CT-42TR mutant | 0.909                                                                              | 0.141  | 0.039                    | 13             | 728                  | Fig. 4G                             |
| MUC1 $\Delta$ CT-42TR +StcE  | 0.978                                                                              | 0.2054 | 0.044                    | 22             | 2361                 | Fig. 4I                             |
| $\alpha$ -AP2                | 1.351                                                                              | 0.175  | 0.044                    | 16             | 1735                 | Fig. 1O                             |
| F-actin                      | 1.228                                                                              | 0.181  | 0.047                    | 15             | 1252                 | Suppl. Fig. 5E                      |

**Supplementary Table 2. Statistical analysis of normalized pillar-to-cytosolic background ratios on 200-nm nanopillar arrays. (A) HeLa cells; (B) U2OS cells.**

A

| Target                | Inner angle of NanoX (deg) | Type of ratio (Type of curvature) | Normalized intensity ratio - U2OS cells on <b>gradient nanoXs</b> |       |                       |             |              |                      |
|-----------------------|----------------------------|-----------------------------------|-------------------------------------------------------------------|-------|-----------------------|-------------|--------------|----------------------|
|                       |                            |                                   | Mean                                                              | SD    | SEM (SD/ $\sqrt{N}$ ) | N (# cells) | n (# nanoXs) | Corresponding figure |
| MUC1 $\Delta$ CT-42TR | 30                         | End-to-side (+)                   | 0.885                                                             | 0.064 | 0.017                 | 15          | 77           | Fig. 2F              |
|                       |                            | Inner-to-side_1 (-)               | 0.986                                                             | 0.112 | 0.029                 |             |              |                      |
|                       |                            | Inner-to-side_2 (-)               | 0.978                                                             | 0.154 | 0.040                 |             |              |                      |
|                       | 45                         | End-to-side (+)                   | 0.910                                                             | 0.117 | 0.029                 | 16          | 78           | Not shown            |
|                       |                            | Inner-to-side_1 (-)               | 1.083                                                             | 0.194 | 0.048                 |             |              |                      |
|                       |                            | Inner-to-side_2 (-)               | 1.040                                                             | 0.088 | 0.022                 |             |              |                      |
|                       | 60                         | End-to-side (+)                   | 0.921                                                             | 0.124 | 0.034                 | 13          | 80           | Fig. 2F              |
|                       |                            | Inner-to-side_1 (-)               | 1.072                                                             | 0.131 | 0.036                 |             |              |                      |
|                       |                            | Inner-to-side_2 (-)               | 1.107                                                             | 0.193 | 0.053                 |             |              |                      |
|                       | 75                         | End-to-side (+)                   | 0.869                                                             | 0.111 | 0.032                 | 12          | 68           | Not shown            |
|                       |                            | Inner-to-side_1 (-)               | 1.104                                                             | 0.179 | 0.052                 |             |              |                      |
|                       |                            | Inner-to-side_2 (-)               | 1.030                                                             | 0.129 | 0.037                 |             |              |                      |
|                       | 90                         | End-to-side (+)                   | 0.821                                                             | 0.138 | 0.038                 | 13          | 70           | Fig. 2F              |
|                       |                            | Inner-to-side_1 (-)               | 1.076                                                             | 0.129 | 0.036                 |             |              |                      |
|                       |                            | Inner-to-side_2 (-)               | 1.079                                                             | 0.128 | 0.035                 |             |              |                      |

B

| Target               | Inner angle of NanoX (deg) | Type of ratio (Type of curvature) | Normalized intensity ratio - U2OS cells on <b>gradient nanoXs</b> |       |                       |             |              |                      |
|----------------------|----------------------------|-----------------------------------|-------------------------------------------------------------------|-------|-----------------------|-------------|--------------|----------------------|
|                      |                            |                                   | Mean                                                              | SD    | SEM (SD/ $\sqrt{N}$ ) | N (# cells) | n (# nanoXs) | Corresponding figure |
| MUC1 $\Delta$ CT-0TR | 30                         | End-to-side (+)                   | 0.978                                                             | 0.064 | 0.016                 | 17          | 89           | Suppl. Fig. 8A       |
|                      |                            | Inner-to-side_1 (-)               | 0.975                                                             | 0.064 | 0.016                 |             |              |                      |
|                      |                            | Inner-to-side_2 (-)               | 0.998                                                             | 0.108 | 0.026                 |             |              |                      |
|                      | 45                         | End-to-side (+)                   | 0.985                                                             | 0.118 | 0.026                 | 20          | 103          | Not shown            |
|                      |                            | Inner-to-side_1 (-)               | 1.066                                                             | 0.111 | 0.025                 |             |              |                      |
|                      |                            | Inner-to-side_2 (-)               | 1.058                                                             | 0.095 | 0.021                 |             |              |                      |
|                      | 60                         | End-to-side (+)                   | 0.992                                                             | 0.099 | 0.025                 | 16          | 84           | Suppl. Fig. 8A       |
|                      |                            | Inner-to-side_1 (-)               | 1.018                                                             | 0.107 | 0.027                 |             |              |                      |
|                      |                            | Inner-to-side_2 (-)               | 0.971                                                             | 0.098 | 0.024                 |             |              |                      |
|                      | 75                         | End-to-side (+)                   | 0.974                                                             | 0.101 | 0.038                 | 7           | 34           | Not shown            |
|                      |                            | Inner-to-side_1 (-)               | 1.023                                                             | 0.056 | 0.021                 |             |              |                      |
|                      |                            | Inner-to-side_2 (-)               | 0.944                                                             | 0.066 | 0.025                 |             |              |                      |
|                      | 90                         | End-to-side (+)                   | 1.047                                                             | 0.071 | 0.029                 | 6           | 29           | Suppl. Fig. 8A       |
|                      |                            | Inner-to-side_1 (-)               | 1.007                                                             | 0.054 | 0.022                 |             |              |                      |
|                      |                            | Inner-to-side_2 (-)               | 1.028                                                             | 0.109 | 0.044                 |             |              |                      |

C

| Target  | Inner angle of NanoX (deg) | Type of ratio (Type of curvature) | Normalized intensity ratio - U2OS cells on <b>gradient nanoXs</b> |       |                       |             |              | Corresponding figure |
|---------|----------------------------|-----------------------------------|-------------------------------------------------------------------|-------|-----------------------|-------------|--------------|----------------------|
|         |                            |                                   | Mean                                                              | SD    | SEM (SD/ $\sqrt{N}$ ) | N (# cells) | n (# nanoXs) |                      |
| F-actin | 30                         | End-to-side (+)                   | 1.164                                                             | 0.209 | 0.036                 | 34          | 232          | Fig. 2G              |
|         |                            | Inner-to-side_1 (-)               | 0.882                                                             | 0.125 | 0.021                 |             |              |                      |
|         |                            | Inner-to-side_2 (-)               | 0.969                                                             | 0.155 | 0.027                 |             |              |                      |
|         | 45                         | End-to-side (+)                   | 1.207                                                             | 0.214 | 0.036                 | 36          | 237          | Not shown            |
|         |                            | Inner-to-side_1 (-)               | 0.915                                                             | 0.147 | 0.024                 |             |              |                      |
|         |                            | Inner-to-side_2 (-)               | 0.926                                                             | 0.137 | 0.023                 |             |              |                      |
|         | 60                         | End-to-side (+)                   | 1.315                                                             | 0.287 | 0.047                 | 37          | 240          | Fig. 2G              |
|         |                            | Inner-to-side_1 (-)               | 0.981                                                             | 0.143 | 0.024                 |             |              |                      |
|         |                            | Inner-to-side_2 (-)               | 0.979                                                             | 0.096 | 0.016                 |             |              |                      |
|         | 75                         | End-to-side (+)                   | 1.329                                                             | 0.398 | 0.078                 | 26          | 174          | Not shown            |
|         |                            | Inner-to-side_1 (-)               | 1.012                                                             | 0.135 | 0.026                 |             |              |                      |
|         |                            | Inner-to-side_2 (-)               | 1.015                                                             | 0.137 | 0.027                 |             |              |                      |
|         | 90                         | End-to-side (+)                   | 1.266                                                             | 0.271 | 0.053                 | 26          | 148          | Fig. 2G              |
|         |                            | Inner-to-side_1 (-)               | 0.950                                                             | 0.169 | 0.033                 |             |              |                      |
|         |                            | Inner-to-side_2 (-)               | 0.961                                                             | 0.172 | 0.034                 |             |              |                      |

**Supplementary Table 3. Statistical analysis of normalized intensity ratios on gradient nanoX arrays for U2OS cells. (A) MUC1- $\Delta$ CT\_42TR-GFP; (B) MUC1- $\Delta$ CT\_0TR-GFP; (C) F-actin.**

A

| Target                       | Colocalization analysis (Pearson's correlation coefficient) with <b>IRSp53 - U2OS</b> cells |       |                          |                |                      |
|------------------------------|---------------------------------------------------------------------------------------------|-------|--------------------------|----------------|----------------------|
|                              | Mean                                                                                        | SD    | SEM<br>(SD/ $\sqrt{N}$ ) | N<br>(# cells) | Corresponding figure |
| MUC1 $\Delta$ CT-0TR         | 0.509                                                                                       | 0.118 | 0.024                    | 24             | Fig. 3E              |
| MUC1 $\Delta$ CT-10TR        | 0.475                                                                                       | 0.124 | 0.030                    | 17             |                      |
| MUC1 $\Delta$ CT-21TR        | 0.506                                                                                       | 0.127 | 0.028                    | 20             |                      |
| MUC1 $\Delta$ CT-42TR        | 0.418                                                                                       | 0.089 | 0.022                    | 16             |                      |
| MUC1 $\Delta$ CT-10TR mutant | 0.490                                                                                       | 0.133 | 0.050                    | 7              | Fig. 4E              |
| MUC1 $\Delta$ CT-21TR mutant | 0.437                                                                                       | 0.127 | 0.042                    | 9              |                      |
| MUC1 $\Delta$ CT-42TR mutant | 0.478                                                                                       | 0.166 | 0.033                    | 25             |                      |

B

| Target                       | Colocalization analysis (Pearson's correlation coefficient) with <b>FBP17 - U2OS</b> cells |       |                          |                |                      |
|------------------------------|--------------------------------------------------------------------------------------------|-------|--------------------------|----------------|----------------------|
|                              | Mean                                                                                       | SD    | SEM<br>(SD/ $\sqrt{N}$ ) | N<br>(# cells) | Corresponding figure |
| MUC1 $\Delta$ CT-0TR         | 0.455                                                                                      | 0.099 | 0.021                    | 22             | Fig. 3E              |
| MUC1 $\Delta$ CT-10TR        | 0.316                                                                                      | 0.139 | 0.025                    | 30             | Fig. 3E & 4F         |
| MUC1 $\Delta$ CT-21TR        | 0.221                                                                                      | 0.096 | 0.019                    | 25             |                      |
| MUC1 $\Delta$ CT-42TR        | 0.252                                                                                      | 0.086 | 0.017                    | 27             |                      |
| MUC1 $\Delta$ CT-10TR mutant | 0.382                                                                                      | 0.107 | 0.020                    | 28             | Fig. 4F              |
| MUC1 $\Delta$ CT-21TR mutant | 0.417                                                                                      | 0.113 | 0.025                    | 20             |                      |
| MUC1 $\Delta$ CT-42TR mutant | 0.340                                                                                      | 0.122 | 0.021                    | 33             |                      |

C

| Target | Colocalization analysis (Pearson's correlation coefficient) with $\alpha$ -MUC1 - <b>HeLa</b> cells |       |                          |                |                      |
|--------|-----------------------------------------------------------------------------------------------------|-------|--------------------------|----------------|----------------------|
|        | Mean                                                                                                | SD    | SEM<br>(SD/ $\sqrt{N}$ ) | N<br>(# cells) | Corresponding figure |
| IRSp53 | 0.250                                                                                               | 0.074 | 0.030                    | 6              | Fig. 3F              |
| FBP17  | 0.115                                                                                               | 0.049 | 0.013                    | 14             |                      |

D

| Target | Colocalization analysis (Pearson's correlation coefficient) with MUC1(FL) – <b>U2OS</b> cells |       |                          |                |                      |
|--------|-----------------------------------------------------------------------------------------------|-------|--------------------------|----------------|----------------------|
|        | Mean                                                                                          | SD    | SEM<br>(SD/ $\sqrt{N}$ ) | N<br>(# cells) | Corresponding figure |
| IRSp53 | 0.535                                                                                         | 0.101 | 0.020                    | 26             | Suppl. Fig. 12C      |
| FBP17  | 0.343                                                                                         | 0.085 | 0.014                    | 35             |                      |

**Supplementary Table 4. Statistical analysis of degree of colocalization (Pearson's correlation coefficient). (A)** between IRSp53-mCherry and 7 different MUC1- $\Delta$ CT-GFP in U2OS cells; **(B)** between mCherry-FBP17 and 7 different MUC1- $\Delta$ CT-GFP in U2OS cells; **(C)** between IRSp53-mCherry or mCherry-FBP17 with  $\alpha$ -MUC1 in HeLa cells; **(D)** between IRSp53-mCherry or mCherry-FBP17 with full-length MUC1-GFP in U2OS cells.

A

| Target | Inner angle of NanoX (deg) | Type of ratio (Type of curvature) | Normalized intensity ratio – SLB with 30% DGS-Ni-NTA on gradient nanoXs |       |                       |                      |              |                      |
|--------|----------------------------|-----------------------------------|-------------------------------------------------------------------------|-------|-----------------------|----------------------|--------------|----------------------|
|        |                            |                                   | Mean                                                                    | SD    | SEM (SD/ $\sqrt{N}$ ) | N (# Fields of view) | n (# nanoXs) | Corresponding figure |
| Podxl  | 30                         | End-to-side (-)                   | 1.143                                                                   | 0.109 | 0.026                 | 18                   | 280          | Fig. 5D              |
|        |                            | Inner-to-side_1 (+)               | 0.896                                                                   | 0.055 | 0.013                 |                      |              |                      |
|        |                            | Inner-to-side_2 (+)               | 0.918                                                                   | 0.067 | 0.018                 |                      |              |                      |
|        | 45                         | End-to-side (-)                   | 1.115                                                                   | 0.088 | 0.020                 | 19                   | 288          | Not shown            |
|        |                            | Inner-to-side_1 (+)               | 0.874                                                                   | 0.062 | 0.014                 |                      |              |                      |
|        |                            | Inner-to-side_2 (+)               | 0.899                                                                   | 0.093 | 0.021                 |                      |              |                      |
|        | 60                         | End-to-side (-)                   | 1.122                                                                   | 0.093 | 0.021                 | 19                   | 302          | Fig. 5D              |
|        |                            | Inner-to-side_1 (+)               | 0.874                                                                   | 0.061 | 0.014                 |                      |              |                      |
|        |                            | Inner-to-side_2 (+)               | 0.848                                                                   | 0.083 | 0.019                 |                      |              |                      |
|        | 75                         | End-to-side (-)                   | 1.106                                                                   | 0.107 | 0.025                 | 19                   | 307          | Not shown            |
|        |                            | Inner-to-side_1 (+)               | 0.897                                                                   | 0.075 | 0.017                 |                      |              |                      |
|        |                            | Inner-to-side_2 (+)               | 0.864                                                                   | 0.081 | 0.019                 |                      |              |                      |
| 90     | End-to-side (-)            | 1.111                             | 0.112                                                                   | 0.026 | 18                    | 263                  | Fig. 5D      |                      |
|        | Inner-to-side_1 (+)        | 0.858                             | 0.069                                                                   | 0.016 |                       |                      |              |                      |
|        | Inner-to-side_2 (+)        | 0.895                             | 0.071                                                                   | 0.017 |                       |                      |              |                      |

B

| Target       | Inner angle of NanoX (deg) | Type of ratio (Type of curvature) | Normalized intensity ratio – SLB with 30% DGS-Ni-NTA on gradient nanoXs |       |                       |                      |              |                      |
|--------------|----------------------------|-----------------------------------|-------------------------------------------------------------------------|-------|-----------------------|----------------------|--------------|----------------------|
|              |                            |                                   | Mean                                                                    | SD    | SEM (SD/ $\sqrt{N}$ ) | N (# Fields of view) | n (# nanoXs) | Corresponding figure |
| Degly. Podxl | 30                         | End-to-side (-)                   | 1.009                                                                   | 0.080 | 0.021                 | 15                   | 210          | Fig. 5E              |
|              |                            | Inner-to-side_1 (+)               | 1.054                                                                   | 0.172 | 0.044                 |                      |              |                      |
|              |                            | Inner-to-side_2 (+)               | 1.009                                                                   | 0.081 | 0.021                 |                      |              |                      |
|              | 45                         | End-to-side (-)                   | 1.007                                                                   | 0.096 | 0.025                 | 15                   | 245          | Not shown            |
|              |                            | Inner-to-side_1 (+)               | 1.023                                                                   | 0.145 | 0.037                 |                      |              |                      |
|              |                            | Inner-to-side_2 (+)               | 1.003                                                                   | 0.082 | 0.021                 |                      |              |                      |
|              | 60                         | End-to-side (-)                   | 0.971                                                                   | 0.086 | 0.022                 | 15                   | 244          | Fig. 5E              |
|              |                            | Inner-to-side_1 (+)               | 1.005                                                                   | 0.111 | 0.022                 |                      |              |                      |
|              |                            | Inner-to-side_2 (+)               | 1.005                                                                   | 0.086 | 0.020                 |                      |              |                      |
|              | 75                         | End-to-side (-)                   | 0.975                                                                   | 0.135 | 0.035                 | 15                   | 246          | Not shown            |
|              |                            | Inner-to-side_1 (+)               | 1.020                                                                   | 0.122 | 0.031                 |                      |              |                      |
|              |                            | Inner-to-side_2 (+)               | 0.992                                                                   | 0.095 | 0.024                 |                      |              |                      |
| 90           | End-to-side (-)            | 0.961                             | 0.078                                                                   | 0.020 | 15                    | 247                  | Fig. 5E      |                      |
|              | Inner-to-side_1 (+)        | 0.985                             | 0.164                                                                   | 0.042 |                       |                      |              |                      |
|              | Inner-to-side_2 (+)        | 0.994                             | 0.157                                                                   | 0.040 |                       |                      |              |                      |

C

| Target | Inner angle of NanoX (deg) | Type of ratio (Type of curvature) | Normalized intensity ratio – SLB with 10% DGS-Ni-NTA on gradient nanoXs |       |                       |                      |              |                      |
|--------|----------------------------|-----------------------------------|-------------------------------------------------------------------------|-------|-----------------------|----------------------|--------------|----------------------|
|        |                            |                                   | Mean                                                                    | SD    | SEM (SD/ $\sqrt{N}$ ) | N (# Fields of view) | n (# nanoXs) | Corresponding figure |
| Podxl  | 30                         | End-to-side (-)                   | 1.073                                                                   | 0.059 | 0.018                 | 11                   | 156          | Fig. 5G              |
|        |                            | Inner-to-side_1 (+)               | 1.148                                                                   | 0.180 | 0.054                 |                      |              |                      |
|        |                            | Inner-to-side_2 (+)               | 1.010                                                                   | 0.102 | 0.031                 |                      |              |                      |
|        | 45                         | End-to-side (-)                   | 1.085                                                                   | 0.057 | 0.017                 | 11                   | 174          | Not shown            |
|        |                            | Inner-to-side_1 (+)               | 1.191                                                                   | 0.156 | 0.047                 |                      |              |                      |
|        |                            | Inner-to-side_2 (+)               | 1.021                                                                   | 0.080 | 0.024                 |                      |              |                      |
|        | 60                         | End-to-side (-)                   | 1.092                                                                   | 0.095 | 0.029                 | 11                   | 184          | Fig. 5G              |
|        |                            | Inner-to-side_1 (+)               | 1.111                                                                   | 0.130 | 0.039                 |                      |              |                      |
|        |                            | Inner-to-side_2 (+)               | 0.996                                                                   | 0.065 | 0.020                 |                      |              |                      |
|        | 75                         | End-to-side (-)                   | 1.082                                                                   | 0.149 | 0.045                 | 11                   | 176          | Not shown            |
|        |                            | Inner-to-side_1 (+)               | 1.153                                                                   | 0.106 | 0.032                 |                      |              |                      |
|        |                            | Inner-to-side_2 (+)               | 1.050                                                                   | 0.074 | 0.022                 |                      |              |                      |
|        | 90                         | End-to-side (-)                   | 1.049                                                                   | 0.060 | 0.018                 | 11                   | 180          | Fig. 5G              |
|        |                            | Inner-to-side_1 (+)               | 1.102                                                                   | 0.093 | 0.028                 |                      |              |                      |
|        |                            | Inner-to-side_2 (+)               | 1.133                                                                   | 0.082 | 0.025                 |                      |              |                      |

D

| Target       | Inner angle of NanoX (deg) | Type of ratio (Type of curvature) | Normalized intensity ratio – SLB with 10% DGS-Ni-NTA on gradient nanoXs |       |                       |                      |              |                      |
|--------------|----------------------------|-----------------------------------|-------------------------------------------------------------------------|-------|-----------------------|----------------------|--------------|----------------------|
|              |                            |                                   | Mean                                                                    | SD    | SEM (SD/ $\sqrt{N}$ ) | N (# Fields of view) | n (# nanoXs) | Corresponding figure |
| Degly. Podxl | 30                         | End-to-side (-)                   | 1.093                                                                   | 0.077 | 0.026                 | 9                    | 125          | Fig. 5H              |
|              |                            | Inner-to-side_1 (+)               | 1.065                                                                   | 0.166 | 0.055                 |                      |              |                      |
|              |                            | Inner-to-side_2 (+)               | 1.021                                                                   | 0.055 | 0.018                 |                      |              |                      |
|              | 45                         | End-to-side (-)                   | 1.076                                                                   | 0.061 | 0.020                 | 9                    | 125          | Not shown            |
|              |                            | Inner-to-side_1 (+)               | 1.061                                                                   | 0.095 | 0.032                 |                      |              |                      |
|              |                            | Inner-to-side_2 (+)               | 0.977                                                                   | 0.070 | 0.023                 |                      |              |                      |
|              | 60                         | End-to-side (-)                   | 1.079                                                                   | 0.080 | 0.027                 | 9                    | 130          | Fig. 5H              |
|              |                            | Inner-to-side_1 (+)               | 0.999                                                                   | 0.125 | 0.042                 |                      |              |                      |
|              |                            | Inner-to-side_2 (+)               | 0.966                                                                   | 0.077 | 0.026                 |                      |              |                      |
|              | 75                         | End-to-side (-)                   | 1.115                                                                   | 0.061 | 0.020                 | 9                    | 145          | Not shown            |
|              |                            | Inner-to-side_1 (+)               | 0.983                                                                   | 0.133 | 0.044                 |                      |              |                      |
|              |                            | Inner-to-side_2 (+)               | 0.951                                                                   | 0.111 | 0.037                 |                      |              |                      |
|              | 90                         | End-to-side (-)                   | 1.063                                                                   | 0.085 | 0.028                 | 9                    | 147          | Fig. 5H              |
|              |                            | Inner-to-side_1 (+)               | 1.009                                                                   | 0.171 | 0.057                 |                      |              |                      |
|              |                            | Inner-to-side_2 (+)               | 1.012                                                                   | 0.202 | 0.067                 |                      |              |                      |

**Supplementary Table 5. Statistical analysis of normalized intensity ratios on gradient nanoX arrays for the SLB experiments. (A)** Podocalyxin on 30% DGS-Ni-NTA-doped lipid bilayers; **(B)** Deglycosylated podocalyxin on 30% DGS-Ni-NTA-doped lipid bilayers; **(C)** Podocalyxin on 10% DGS-Ni-NTA-doped lipid bilayers; **(D)** Deglycosylated podocalyxin on 10% DGS-Ni-NTA-doped lipid bilayers.



**A**

| Target                | Time (min) | Endocytosis analysis (Anti- $\alpha$ -GFP intensity) - <b>U2OS</b> cells on <b>flat surfaces</b> |       |                       |             | Corresponding figure |
|-----------------------|------------|--------------------------------------------------------------------------------------------------|-------|-----------------------|-------------|----------------------|
|                       |            | Mean                                                                                             | SD    | SEM (SD/ $\sqrt{N}$ ) | N (# cells) |                      |
| MUC1 $\Delta$ CT-0TR  | 15         | 182.3                                                                                            | 94.8  | 8.58                  | 122         | Fig. 6D              |
|                       | 30         | 273.5                                                                                            | 198.7 | 19.0                  | 110         |                      |
|                       | 60         | 500.1                                                                                            | 207.6 | 22.9                  | 82          |                      |
| MUC1 $\Delta$ CT-10TR | 15         | 179.4                                                                                            | 69.3  | 8.34                  | 69          |                      |
|                       | 30         | 215.2                                                                                            | 111.2 | 11.4                  | 95          |                      |
|                       | 60         | 269.1                                                                                            | 133.8 | 10.9                  | 150         |                      |
| MUC1 $\Delta$ CT-42TR | 15         | 166.2                                                                                            | 81.7  | 9.19                  | 79          |                      |
|                       | 30         | 132.4                                                                                            | 65.7  | 4.71                  | 195         |                      |
|                       | 60         | 153.3                                                                                            | 85.6  | 5.77                  | 220         |                      |

**B**

| Target                | Time (min) | Endocytosis analysis (Anti- $\alpha$ -GFP intensity) - <b>U2OS</b> cells on <b>200-nm nanopillars</b> |       |                       |             | Corresponding figure |
|-----------------------|------------|-------------------------------------------------------------------------------------------------------|-------|-----------------------|-------------|----------------------|
|                       |            | Mean                                                                                                  | SD    | SEM (SD/ $\sqrt{N}$ ) | N (# cells) |                      |
| MUC1 $\Delta$ CT-0TR  | 15         | 270.3                                                                                                 | 101.5 | 13.0                  | 61          | Fig. 6E              |
|                       | 30         | 468.5                                                                                                 | 247.6 | 26.0                  | 91          |                      |
|                       | 60         | 769.8                                                                                                 | 335.4 | 30.8                  | 119         |                      |
| MUC1 $\Delta$ CT-10TR | 15         | 200.2                                                                                                 | 69.6  | 9.14                  | 58          |                      |
|                       | 30         | 320.8                                                                                                 | 162.7 | 21.0                  | 60          |                      |
|                       | 60         | 432.2                                                                                                 | 208.5 | 15.9                  | 171         |                      |
| MUC1 $\Delta$ CT-42TR | 15         | 176.2                                                                                                 | 88.3  | 9.87                  | 80          |                      |
|                       | 30         | 151.5                                                                                                 | 73.9  | 5.46                  | 183         |                      |
|                       | 60         | 174.2                                                                                                 | 82.6  | 6.28                  | 173         |                      |

**C**

| Target                       | Substrate  | Endocytosis analysis (Anti- $\alpha$ -GFP intensity) - <b>U2OS</b> cells after <b>30 min</b> |       |                       |             | Corresponding figure |
|------------------------------|------------|----------------------------------------------------------------------------------------------|-------|-----------------------|-------------|----------------------|
|                              |            | Mean                                                                                         | SD    | SEM (SD/ $\sqrt{N}$ ) | N (# cells) |                      |
| MUC1 $\Delta$ CT-42TR +StcE  | Flat       | 216.2                                                                                        | 105.7 | 5.39                  | 385         | Fig. 6F              |
|                              | Nanopillar | 303.1                                                                                        | 117.2 | 9.73                  | 145         |                      |
| MUC1 $\Delta$ CT-42TR mutant | Flat       | 258.9                                                                                        | 180.9 | 11.0                  | 271         |                      |
|                              | Nanopillar | 280.7                                                                                        | 182.8 | 11.5                  | 254         |                      |

**Supplementary Table 6. Statistical analysis of MUC1 endocytosis levels in U2OS cells. (A)** 3 different MUC1- $\Delta$ CT-GFP on flat surfaces; **(B)** 3 different MUC1- $\Delta$ CT-GFP on 200-nm nanopillar arrays; **(C)** StcE-treated MUC1<sub>42TR</sub>-GFP or MUC1<sub>42TR</sub>-GFP triple mutant on either flat surfaces or 200-nm nanopillar arrays.

A

| Target                  | Nanobar width (nm) | Normalized nanobar end-to-side intensity ratio - <b>U2OS</b> cells on <b>gradient nanobars</b> |       |                       |             |                | Corresponding figure |
|-------------------------|--------------------|------------------------------------------------------------------------------------------------|-------|-----------------------|-------------|----------------|----------------------|
|                         |                    | Mean                                                                                           | SD    | SEM (SD/ $\sqrt{N}$ ) | N (# cells) | n (# nanobars) |                      |
| MUC1<br>$\Delta$ CT-0TR | 200                | 1.055                                                                                          | 0.091 | 0.019                 | 23          | 180            | Fig. 7J              |
|                         | 300                | 1.074                                                                                          | 0.108 | 0.026                 | 17          | 120            |                      |
|                         | 400                | 1.083                                                                                          | 0.108 | 0.019                 | 32          | 262            |                      |
|                         | 500                | 1.042                                                                                          | 0.105 | 0.023                 | 20          | 171            |                      |
|                         | 600                | 1.058                                                                                          | 0.120 | 0.023                 | 27          | 217            |                      |
|                         | 700                | 1.054                                                                                          | 0.101 | 0.022                 | 21          | 181            |                      |
|                         | 800                | 1.060                                                                                          | 0.133 | 0.027                 | 24          | 189            |                      |
|                         | 900                | 1.025                                                                                          | 0.115 | 0.029                 | 16          | 125            |                      |
|                         | 1000               | 1.073                                                                                          | 0.138 | 0.026                 | 28          | 242            |                      |
|                         | 1200               | 1.013                                                                                          | 0.105 | 0.025                 | 17          | 143            |                      |
|                         | 1600               | 1.001                                                                                          | 0.054 | 0.014                 | 16          | 136            |                      |
|                         | 2000               | 1.034                                                                                          | 0.104 | 0.028                 | 14          | 125            |                      |

B

| Target                   | Nanobar width (nm) | Normalized nanobar end-to-side intensity ratio - <b>U2OS</b> cells on <b>gradient nanobars</b> |       |                       |             |                | Corresponding figure |
|--------------------------|--------------------|------------------------------------------------------------------------------------------------|-------|-----------------------|-------------|----------------|----------------------|
|                          |                    | Mean                                                                                           | SD    | SEM (SD/ $\sqrt{N}$ ) | N (# cells) | n (# nanobars) |                      |
| MUC1<br>$\Delta$ CT-10TR | 200                | 1.043                                                                                          | 0.109 | 0.029                 | 14          | 127            | Suppl. Fig. S19A     |
|                          | 300                | 1.017                                                                                          | 0.107 | 0.048                 | 5           | 39             |                      |
|                          | 400                | 1.054                                                                                          | 0.199 | 0.041                 | 24          | 221            |                      |
|                          | 500                | 1.048                                                                                          | 0.128 | 0.036                 | 13          | 153            |                      |
|                          | 600                | 1.048                                                                                          | 0.234 | 0.046                 | 26          | 208            |                      |
|                          | 700                | 0.987                                                                                          | 0.074 | 0.023                 | 10          | 109            |                      |
|                          | 800                | 1.017                                                                                          | 0.107 | 0.020                 | 29          | 281            |                      |
|                          | 900                | 1.006                                                                                          | 0.114 | 0.031                 | 14          | 187            |                      |
|                          | 1000               | 1.029                                                                                          | 0.097 | 0.018                 | 30          | 292            |                      |
|                          | 1200               | 1.020                                                                                          | 0.144 | 0.032                 | 20          | 138            |                      |
|                          | 1600               | 1.027                                                                                          | 0.102 | 0.025                 | 17          | 116            |                      |
|                          | 2000               | 1.024                                                                                          | 0.085 | 0.027                 | 10          | 82             |                      |

C

| Target                | Nanobar width (nm) | Normalized nanobar end-to-side intensity ratio - U2OS cells on <b>gradient nanobars</b> |       |                       |             |                | Corresponding figure |
|-----------------------|--------------------|-----------------------------------------------------------------------------------------|-------|-----------------------|-------------|----------------|----------------------|
|                       |                    | Mean                                                                                    | SD    | SEM (SD/ $\sqrt{N}$ ) | N (# cells) | n (# nanobars) |                      |
| MUC1 $\Delta$ CT-21TR | 200                | 0.934                                                                                   | 0.054 | 0.013                 | 17          | 153            | Suppl. Fig. S19B     |
|                       | 300                | 0.936                                                                                   | 0.037 | 0.014                 | 7           | 51             |                      |
|                       | 400                | 0.973                                                                                   | 0.068 | 0.014                 | 24          | 178            |                      |
|                       | 500                | 0.958                                                                                   | 0.040 | 0.016                 | 6           | 54             |                      |
|                       | 600                | 0.958                                                                                   | 0.073 | 0.016                 | 22          | 148            |                      |
|                       | 700                | 0.963                                                                                   | 0.076 | 0.029                 | 7           | 65             |                      |
|                       | 800                | 0.962                                                                                   | 0.075 | 0.016                 | 22          | 175            |                      |
|                       | 900                | 0.963                                                                                   | 0.091 | 0.029                 | 10          | 96             |                      |
|                       | 1000               | 0.947                                                                                   | 0.057 | 0.013                 | 18          | 137            |                      |
|                       | 1200               | 0.976                                                                                   | 0.070 | 0.017                 | 17          | 117            |                      |
|                       | 1600               | 0.996                                                                                   | 0.104 | 0.028                 | 14          | 105            |                      |
|                       | 2000               | 0.985                                                                                   | 0.054 | 0.016                 | 12          | 85             |                      |

D

| Target                | Nanobar width (nm) | Normalized nanobar end-to-side intensity ratio - U2OS cells on <b>gradient nanobars</b> |       |                       |             |                | Corresponding figure |
|-----------------------|--------------------|-----------------------------------------------------------------------------------------|-------|-----------------------|-------------|----------------|----------------------|
|                       |                    | Mean                                                                                    | SD    | SEM (SD/ $\sqrt{N}$ ) | N (# cells) | n (# nanobars) |                      |
| MUC1 $\Delta$ CT-42TR | 200                | 0.895                                                                                   | 0.115 | 0.018                 | 38          | 407            | Fig. 7I              |
|                       | 300                | 0.945                                                                                   | 0.062 | 0.015                 | 18          | 165            |                      |
|                       | 400                | 0.941                                                                                   | 0.131 | 0.023                 | 34          | 286            |                      |
|                       | 500                | 0.922                                                                                   | 0.081 | 0.023                 | 13          | 109            |                      |
|                       | 600                | 0.916                                                                                   | 0.103 | 0.016                 | 41          | 341            |                      |
|                       | 700                | 0.928                                                                                   | 0.065 | 0.017                 | 14          | 125            |                      |
|                       | 800                | 0.913                                                                                   | 0.101 | 0.018                 | 31          | 245            |                      |
|                       | 900                | 0.932                                                                                   | 0.070 | 0.015                 | 21          | 177            |                      |
|                       | 1000               | 0.945                                                                                   | 0.122 | 0.019                 | 41          | 325            |                      |
|                       | 1200               | 0.946                                                                                   | 0.128 | 0.027                 | 23          | 210            |                      |
|                       | 1600               | 1.006                                                                                   | 0.049 | 0.011                 | 19          | 171            |                      |
|                       | 2000               | 1.010                                                                                   | 0.085 | 0.019                 | 19          | 166            |                      |

E

| Target                      | Nanobar width (nm) | Normalized nanobar end-to-side intensity ratio - <b>U2OS</b> cells on <b>gradient nanobars</b> |       |                       |             |                | Corresponding figure |
|-----------------------------|--------------------|------------------------------------------------------------------------------------------------|-------|-----------------------|-------------|----------------|----------------------|
|                             |                    | Mean                                                                                           | SD    | SEM (SD/ $\sqrt{N}$ ) | N (# cells) | n (# nanobars) |                      |
| MUC1 $\Delta$ CT-42TR +StcE | 200                | 1.022                                                                                          | 0.064 | 0.015                 | 18          | 159            | Suppl. Fig. S19C     |
|                             | 300                | 1.042                                                                                          | 0.099 | 0.038                 | 7           | 71             |                      |
|                             | 400                | 1.051                                                                                          | 0.070 | 0.017                 | 17          | 149            |                      |
|                             | 500                | 1.074                                                                                          | 0.062 | 0.025                 | 6           | 70             |                      |
|                             | 600                | 1.045                                                                                          | 0.069 | 0.016                 | 19          | 152            |                      |
|                             | 700                | 1.068                                                                                          | 0.091 | 0.032                 | 8           | 42             |                      |
|                             | 800                | 1.052                                                                                          | 0.071 | 0.016                 | 19          | 162            |                      |
|                             | 900                | 1.043                                                                                          | 0.075 | 0.025                 | 9           | 69             |                      |
|                             | 1000               | 1.041                                                                                          | 0.066 | 0.015                 | 18          | 146            |                      |
|                             | 1200               | 1.032                                                                                          | 0.055 | 0.021                 | 7           | 64             |                      |
|                             | 1600               | 1.024                                                                                          | 0.047 | 0.015                 | 10          | 86             |                      |
|                             | 2000               | 1.027                                                                                          | 0.056 | 0.015                 | 14          | 138            |                      |

F

| Target                       | Nanobar width (nm) | Normalized nanobar end-to-side intensity ratio - <b>U2OS</b> cells on <b>gradient nanobars</b> |       |                       |             |                | Corresponding figure |
|------------------------------|--------------------|------------------------------------------------------------------------------------------------|-------|-----------------------|-------------|----------------|----------------------|
|                              |                    | Mean                                                                                           | SD    | SEM (SD/ $\sqrt{N}$ ) | N (# cells) | n (# nanobars) |                      |
| MUC1 $\Delta$ CT-42TR mutant | 200                | 0.986                                                                                          | 0.075 | 0.013                 | 36          | 235            | Suppl. Fig. S19D     |
|                              | 300                | 1.022                                                                                          | 0.118 | 0.025                 | 23          | 138            |                      |
|                              | 400                | 1.017                                                                                          | 0.094 | 0.015                 | 37          | 250            |                      |
|                              | 500                | 0.991                                                                                          | 0.086 | 0.018                 | 23          | 129            |                      |
|                              | 600                | 0.972                                                                                          | 0.072 | 0.013                 | 29          | 168            |                      |
|                              | 700                | 0.978                                                                                          | 0.058 | 0.014                 | 18          | 94             |                      |
|                              | 800                | 0.964                                                                                          | 0.077 | 0.014                 | 30          | 170            |                      |
|                              | 900                | 0.995                                                                                          | 0.089 | 0.017                 | 26          | 143            |                      |
|                              | 1000               | 1.001                                                                                          | 0.085 | 0.015                 | 33          | 208            |                      |
|                              | 1200               | 0.969                                                                                          | 0.025 | 0.009                 | 8           | 58             |                      |
|                              | 1600               | 1.013                                                                                          | 0.067 | 0.017                 | 16          | 130            |                      |
|                              | 2000               | 1.015                                                                                          | 0.075 | 0.020                 | 14          | 107            |                      |

**Supplementary Table 7. Statistical analysis of normalized nanobar end-to-side ratios on gradient nanobar arrays for U2OS cells.**

| Protein encoded                              | Type of DNA fragments | PCR Template                                           | DNA primer sequence                                                  | PCR product length (bp) |
|----------------------------------------------|-----------------------|--------------------------------------------------------|----------------------------------------------------------------------|-------------------------|
| (These three plasmids share the same vector) | Linear Vector         | pPB_Muc1_0<br>_mOxGFP_d<br>CT_BlpI                     | GACCGAGGTGACATCCTGTC<br>GCCTCAGGCTCTGCATCAG                          | 6451                    |
| MUC1ΔCT-42TR-<br>mOxGFP<br>Triple Mutant     | Insert 1              |                                                        | GCAGGTCTTGCATCAGGGCCTGAGGCAGCAGCCGTA<br>CAGGATGTCACCTCGGTCC          | 1304                    |
|                                              | Insert 2              | pPB_Tet_Sum<br>oStar_Muc1_<br>21T_rTAsM2<br>_IRES_NeoR | CCTGATGCAAGACCTGCCCCTGGTGCGACAGCACCA<br>TGATGCAGAGCCTGAGGCAGCAGCCGTA | 1278                    |
| MUC1ΔCT-21TR-<br>mOxGFP<br>Triple Mutant     | Insert                |                                                        | CAGGATGTCACCTCGGTCC<br>TGATGCAGAGCCTGAGGCAGCAGCCGTA                  | 1296                    |
| MUC1ΔCT-10TR-<br>mOxGFP<br>Triple Mutant     | Insert                |                                                        | CAGGATGTCACCTCGGTCC<br>TGATGCAGAGCCTGAGGCTGCAGCTGTACACCATGC          | 636                     |

**Supplementary Table 8. DNA sequences of primers used for MUC1ΔCT-mOxGFP Triple Mutant plasmid construction.**

The PCR products were then subject to Gibson Assembly. Two PCR templates are kind gifts from Matthew Paszek Lab at Cornell University. All DNA primers were purchased from Integrated DNA Technologies (IDT).

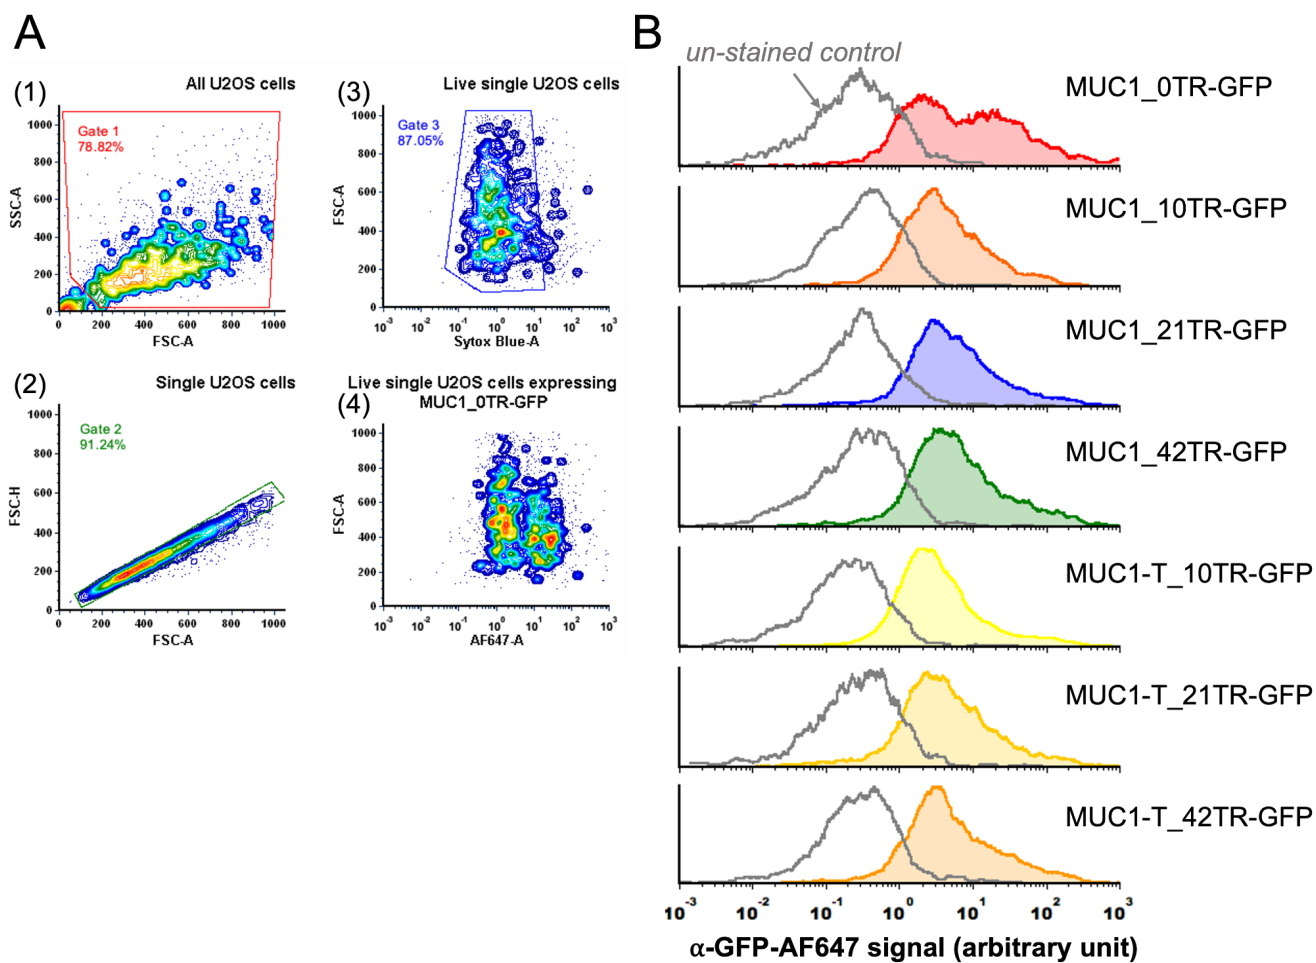

**Supplementary Figure 1. Flow cytometric results show comparable cell surface expression levels of various MUC1- $\Delta$ CT-GFP in U2OS cells.**

**(A)** Representative flow cytometric gating strategy for determining various MUC1- $\Delta$ CT-GFP expressions in U2OS cells. Briefly, (1) Cell debris were first excluded and (2) U2OS cells were then gated for single cells. Subsequently, (3) live single U2OS cells were gated based on Sytox Blue staining. (4) Cell surface expression levels of various MUC1- $\Delta$ CT-GFP were then determined. **(B)** Histograms of cell surface expression levels of various MUC1- $\Delta$ CT-GFP in U2OS cells. All MUC1- $\Delta$ CT-GFP were labeled with rabbit anti-GFP antibodies and goat anti-rabbit IgG Alexa Fluor 647 (AF647). After applying the gating strategy, there are ~3500-18000 cells included per population.

### Step 1

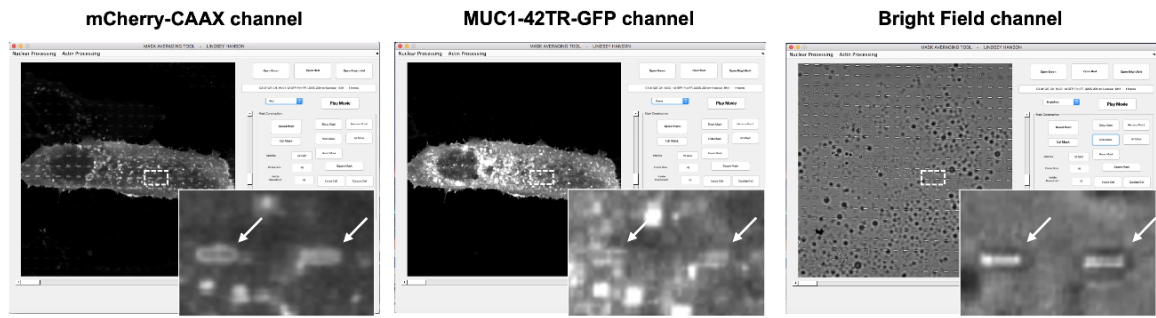

### Step 2

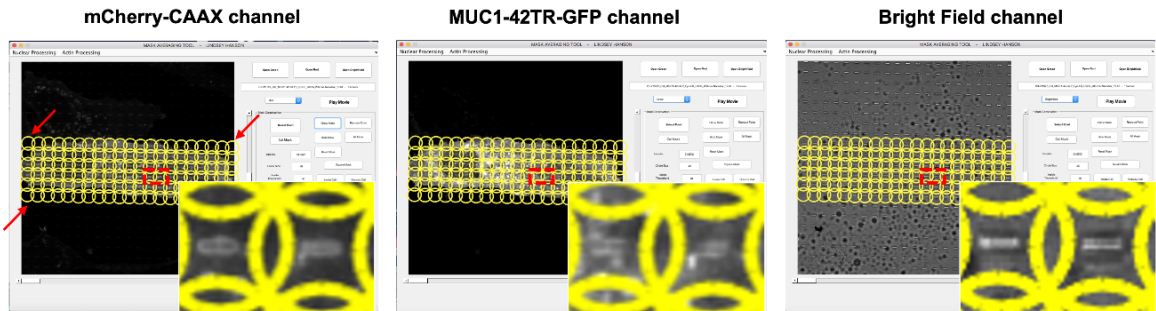

### Step 3

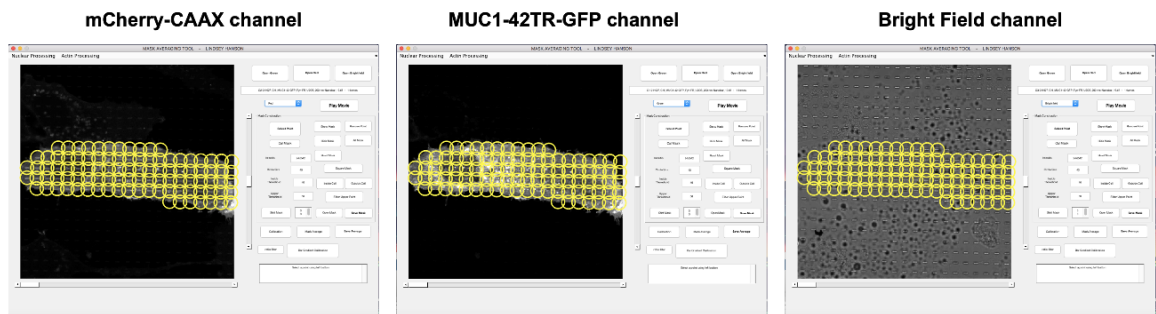

### Step 4

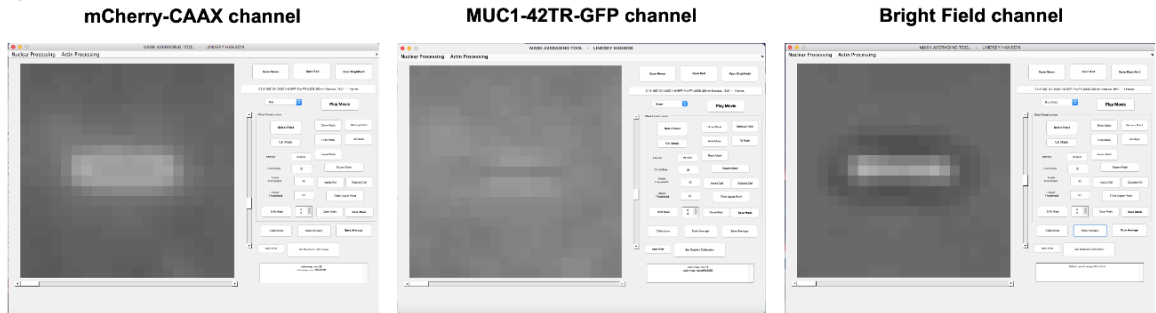

### Step 5

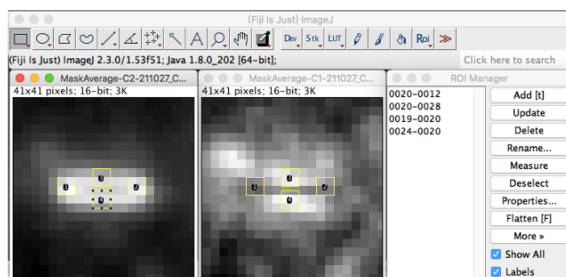

### Step 6

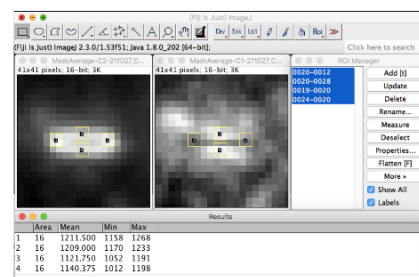

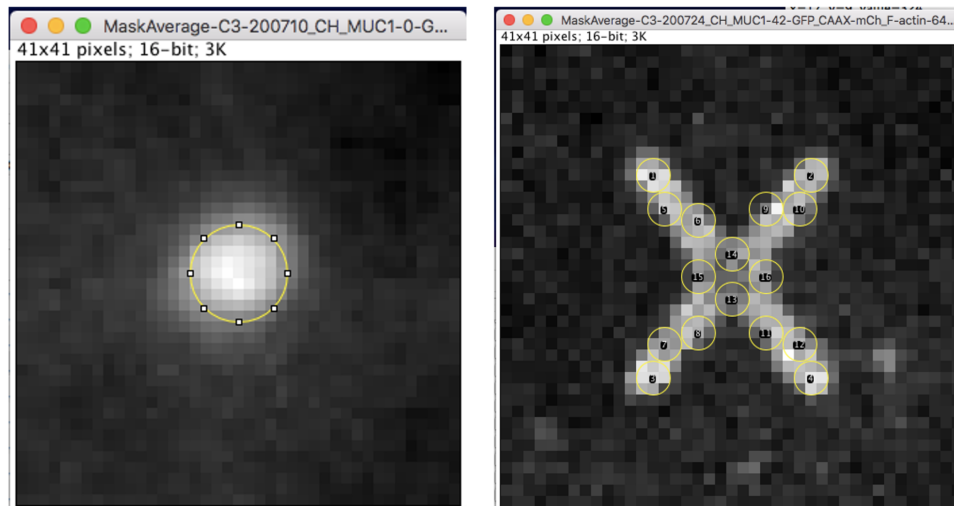

**Supplementary Figure 2. A detailed description for the quantification of fluorescence signals of proteins on nanostructured substrates.** The confocal fluorescence images were processed and analyzed using ImageJ and customized MATLAB programs. To quantify the curvature preference of a protein of interest, the intensity can be normalized by the membrane intensity at the same location (for nanopillars experiments), or nanostructures with internal references (such as the sidewalls of nanobars or nanoXs) can be used.

Procedure (use nanobar experiment as an example):

1. Load three-channel (GFP, mCherry, and bright field) images taken from the same field.
2. Manually click on the center of three nanobars (red arrows) in the mCherry-CAAX channel. Since the distance between nanobars is fixed, the software automatically locates all the nanobars in a rectangular array (yellow circles). Next, the software automatically propagates the nanopillar locations to all three color channels (GFP, mCherry, and bright field).
3. By intensity thresholding in the mCherry channel, the software removes nanobars that are located outside the cell of interest. In some cases, a nanobar outside the cell needs to be manually removed by clicking anywhere inside its yellow circle.
4. Based on the nanobar locations, the software automatically creates an averaged nanobar image from all the nanobars inside a cell. The cell in the example image interacts with 100 nanobars. In general, each cell contacts ~30-150 nanobars. An average nanobar image is created for each color channel for the selected cell.
5. Four ROIs, two located at the ends of the nanobar and two located at the side walls of the nanobar, are created on the membrane mCherry channel of the averaged nanobar image. The same ROI locations are re-created on the GFP channel. The same ROIs are used for all cells.
6. From the ROIs, the nanobar end-to-side ratios are independently calculated for mCherry and GFP channels. Then, the ratio for the MUC1\_42TR-GFP channel (green) is divided by the ratio for the mCherry-CAAX channel (red). This step normalizes the protein ratio to the membrane ratio, which helps to distinguish whether the protein truly has a curvature preference vs. whether there is a higher protein signal due to more membranes at curved locations.
  - Repeat the step 1-3 for nanobars of other sizes if necessary.
  - For nanopillar experiments, create a small circular ROI to cover the fluorescence signal at nanopillars. The region surrounding the nanopillar ROI is used for assessing cytosolic background. Calculate the intensity ratio by dividing the fluorescence signal at nanopillars by that of the surrounding.
  - For nanoX experiments, create 16 small ROIs to cover the centers of 4 ends, 8 side walls (2 for each arm) and 4 inner faces. Measure the fluorescence intensities in the 16 ROIs and compute the end-to-side, two inner-to-side intensity ratios.



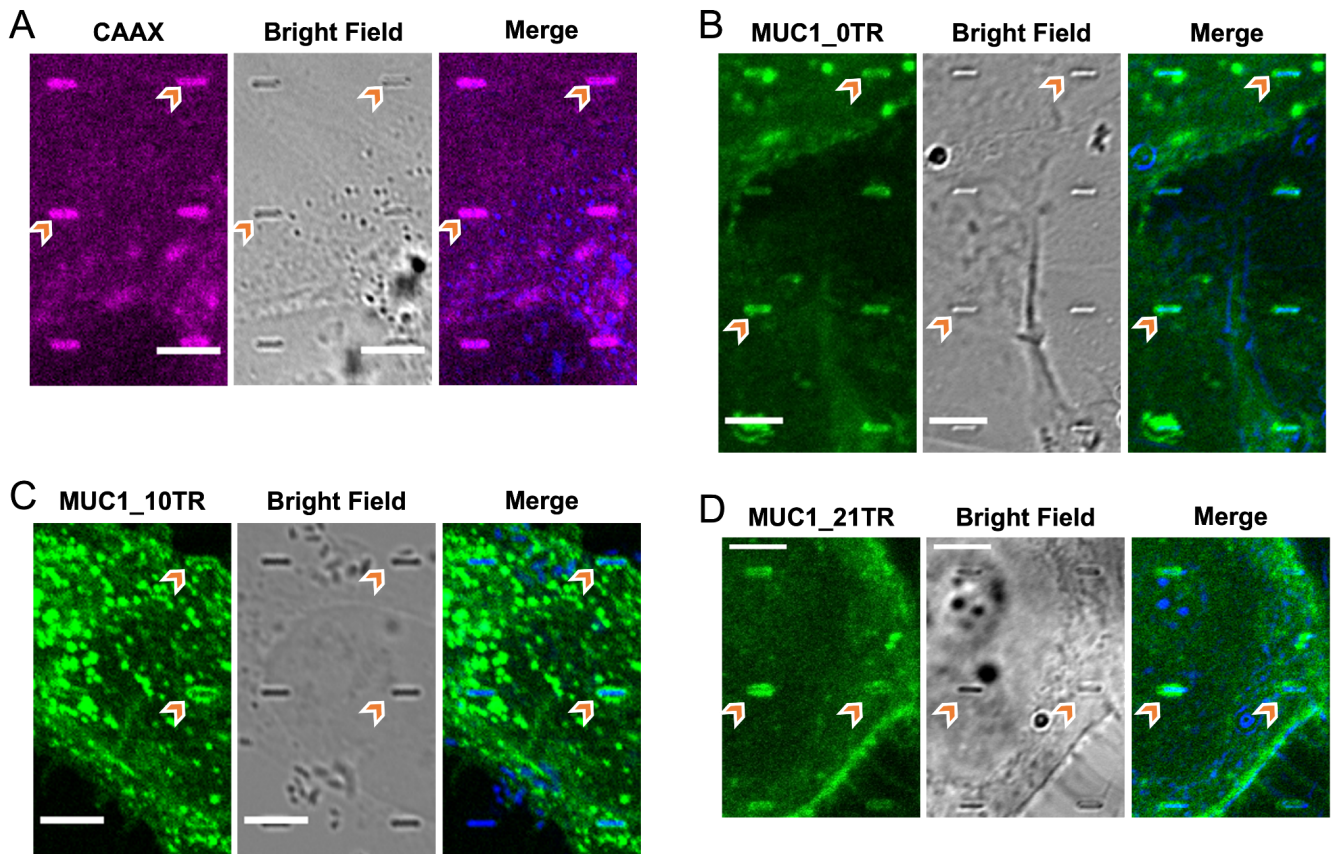

**Supplementary Figure 3. MUC1- $\Delta$ CT-GFP-transfected U2OS cells on the 200-nm nanobar arrays.**

Zoom-in confocal images of (A) mCherry-CAAX-transfected, (B) MUC1- $\Delta$ CT\_0TR-GFP-transfected, (C) MUC1- $\Delta$ CT\_10TR-GFP-transfected, and (D) MUC1- $\Delta$ CT\_21TR-GFP-transfected U2OS cells cultured on the 200-nm nanobar arrays. Bright field images of the nanobar in the merge subsets were converted into blue color for visualization purposes. Scale bars represent 5  $\mu$ m. Arrows were drawn for guidance purposes.

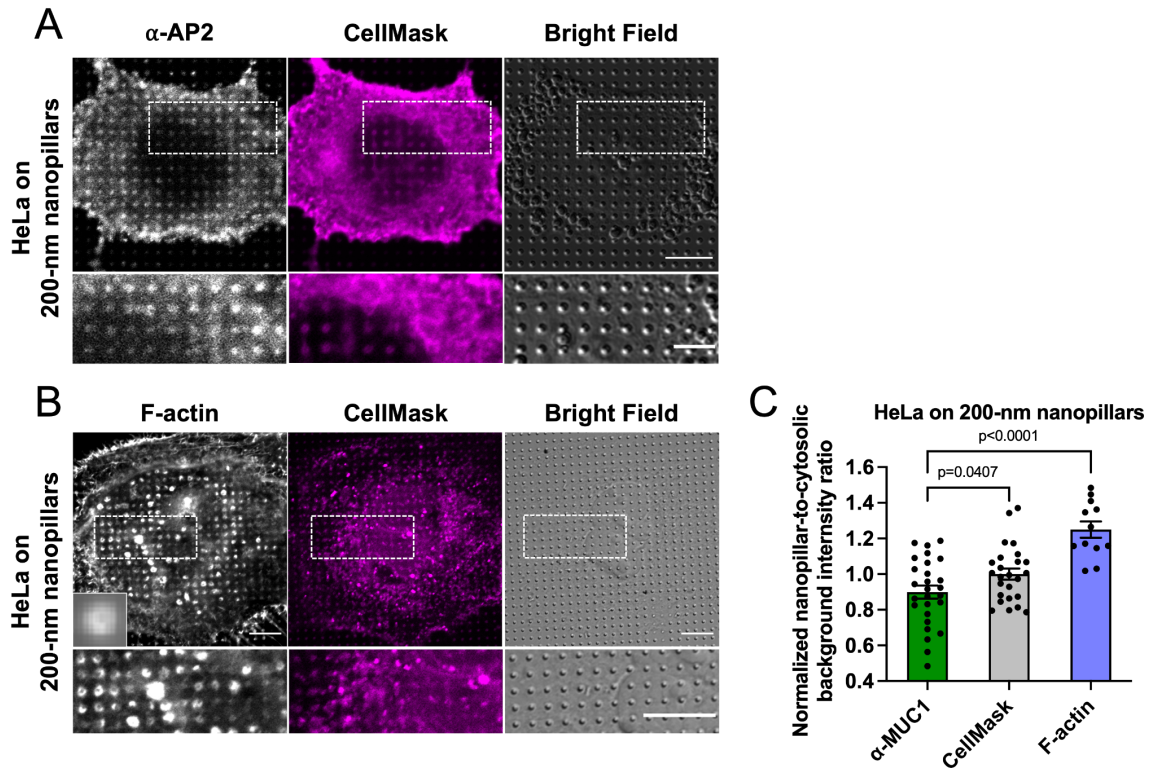

**Supplementary Figure 4. AP2 and F-actin staining in U2OS or HeLa cells on the 200-nm nanopillar arrays.**

(A-B) Confocal images show accumulation of (A)  $\alpha$ -AP2 and (B) F-actin on the 200-nm-diameter nanopillars in HeLa cells. The square inset is the averaged images of proteins distributed on the nanopillars. (C) Quantification of  $\alpha$ -MUC1, CellMask and F-actin signals on HeLa cells plated on the 200-nm nanopillar arrays (see Supplementary Table 2A for the detailed statistics). The ratios for  $\alpha$ -MUC1 and CellMask are from Fig. 1N. All ratios have been normalized against the CellMask signals. The spacing and height of the 200-nm nanopillar arrays are 2.5  $\mu$ m and 1  $\mu$ m, respectively. Scale bars represent 10  $\mu$ m. F-actin was stained with phalloidin. Welch's t tests (unpaired, two-tailed, not assuming equal variance) are applied for all statistical analyses in this figure. Error bars represent SEM.

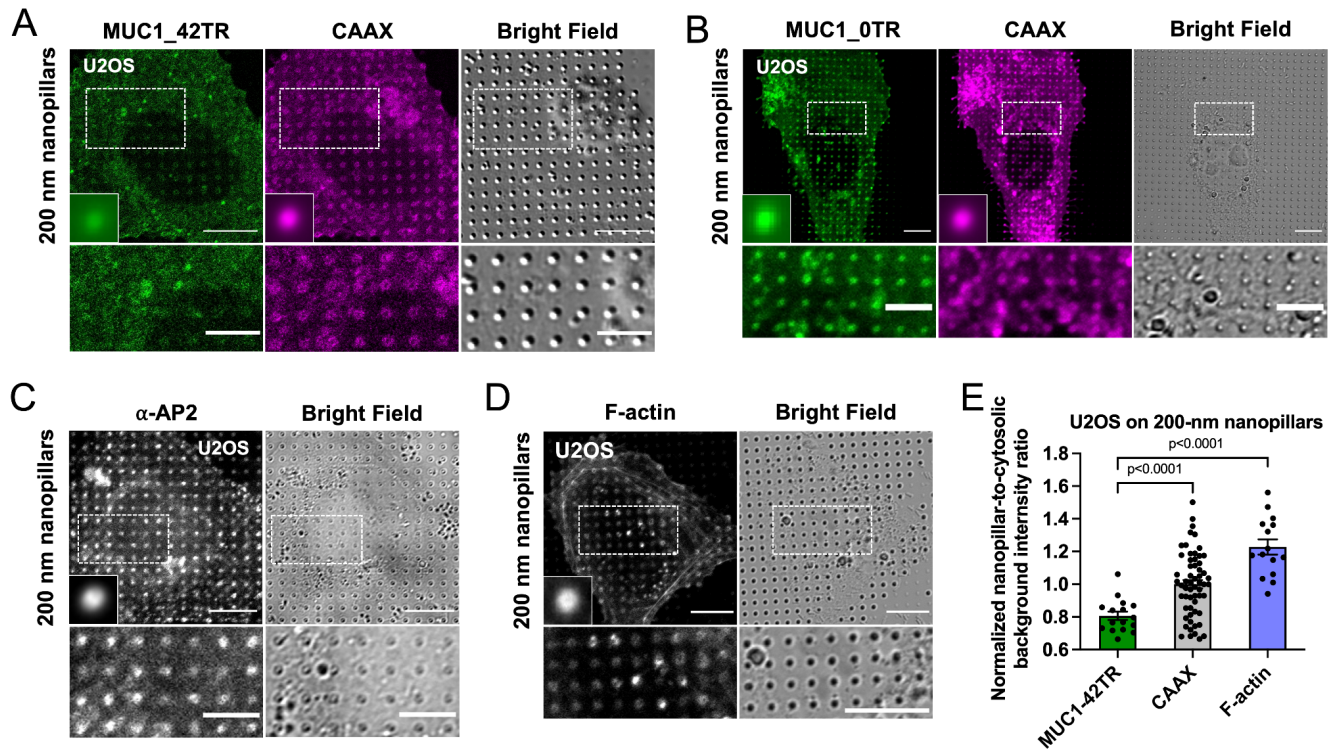

**Supplementary Figure 5. MUC1-ΔCT-GFP-transfected U2OS cells on the 200-nm nanopillar arrays.**

Confocal images of **(A)** MUC1-ΔCT<sub>42TR</sub>-GFP- and mCherry-CAAX-cotransfected U2OS cells, **(B)** MUC1-ΔCT<sub>0TR</sub>-GFP- and mCherry-CAAX-cotransfected U2OS cells, **(C)** U2OS cells stained with anti-AP2 antibodies and **(D)** U2OS cells stained with phalloidin cultured on the 200-nm nanopillar arrays. The square insets are the averaged images of proteins distributed on the nanopillars. **(E)** Quantification of MUC1-ΔCT<sub>42TR</sub>-GFP, CellMask and F-actin signals in U2OS cells plated on the 200-nm nanopillar arrays (see Supplementary Table 2B for the detailed statistics). The ratios for α-MUC1 and CAAX are from Fig. 10. All ratios have been normalized against the mCherry-CAAX signals. The spacing and height of the 200-nm nanopillar arrays are 2.5 μm and 1 μm, respectively. Scale bars represent 10 μm; Scale bars in the zoom-in images represent 5 μm. Welch's t tests (unpaired, two-tailed, not assuming equal variance) are applied for all statistical analyses in this figure.

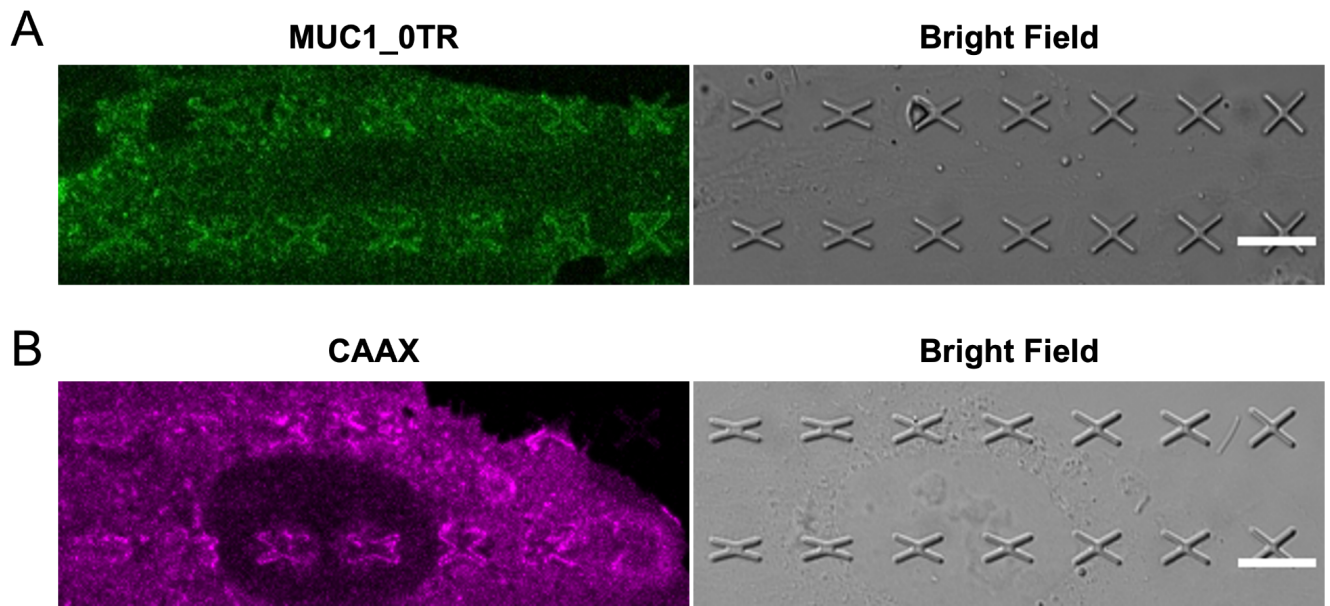

**Supplementary Figure 6. MUC1- $\Delta$ CT\_0TR-GFP-transfected U2OS cells on the gradient nanoX arrays.**

Confocal images of **(A)** MUC1- $\Delta$ CT\_0TR-GFP-transfected U2OS cells and **(B)** mCherry-CAAX-transfected U2OS cells cultured on the gradient nanoX arrays. All nanoX are 350 nm in width, 2  $\mu$ m in height and 10  $\mu$ m in spacing. NanoX inner angle ( $\theta$ ) increment: 15°. Scale bars represent 10  $\mu$ m.



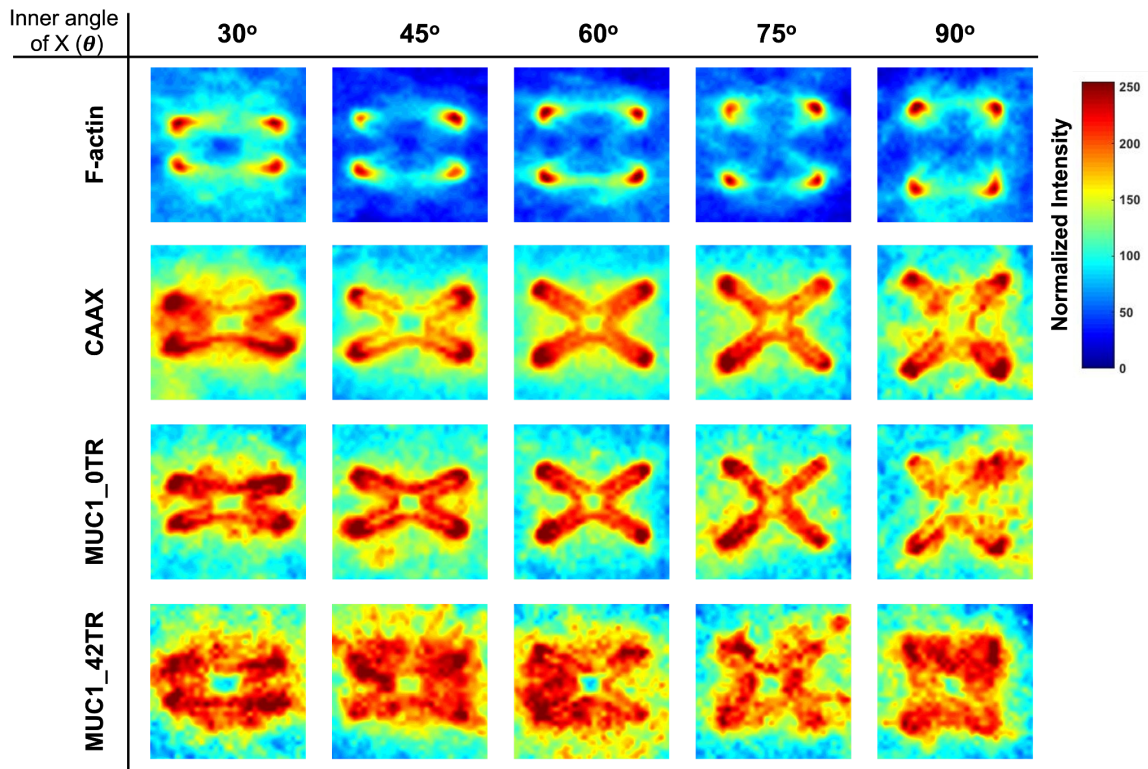

**Supplementary Figure 7. Heatmaps depicting the intensity distribution of mCherry-CAAX, two MUC1- $\Delta$  CT-GFP, and F-actin signals in U2OS cells plated on the gradient nanoX arrays (Cell-based experiments).**

All nanoX are 350 nm in width, 2  $\mu$ m in height and 10  $\mu$ m in spacing. NanoX inner angle ( $\theta$ ) increment: 15°.

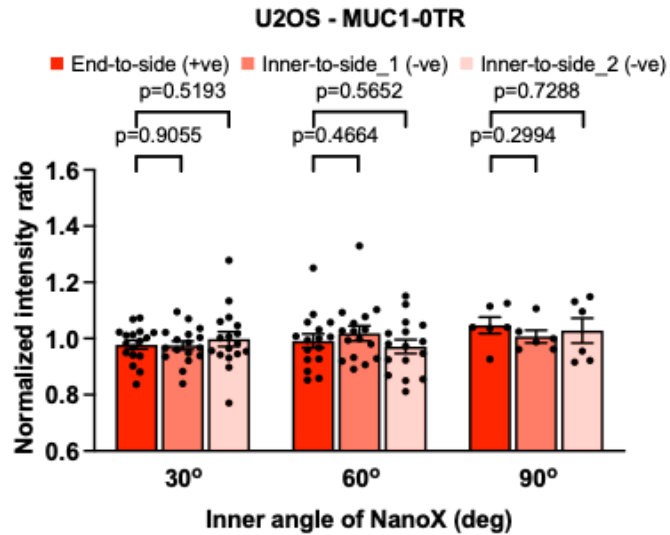

**Supplementary Figure 8. Quantification of MUC1- $\Delta$ CT-0TR-GFP signals in U2OS cells plated on the gradient nanoX arrays. (Cell-based experiments).**

All ratios have been normalized against the mCherry-CAAX signals (see Supplementary Table 3B for the detailed statistics). Welch's t tests (unpaired, two-tailed, not assuming equal variance) are applied for all statistical analyses in this figure. Error bars represent SEM.

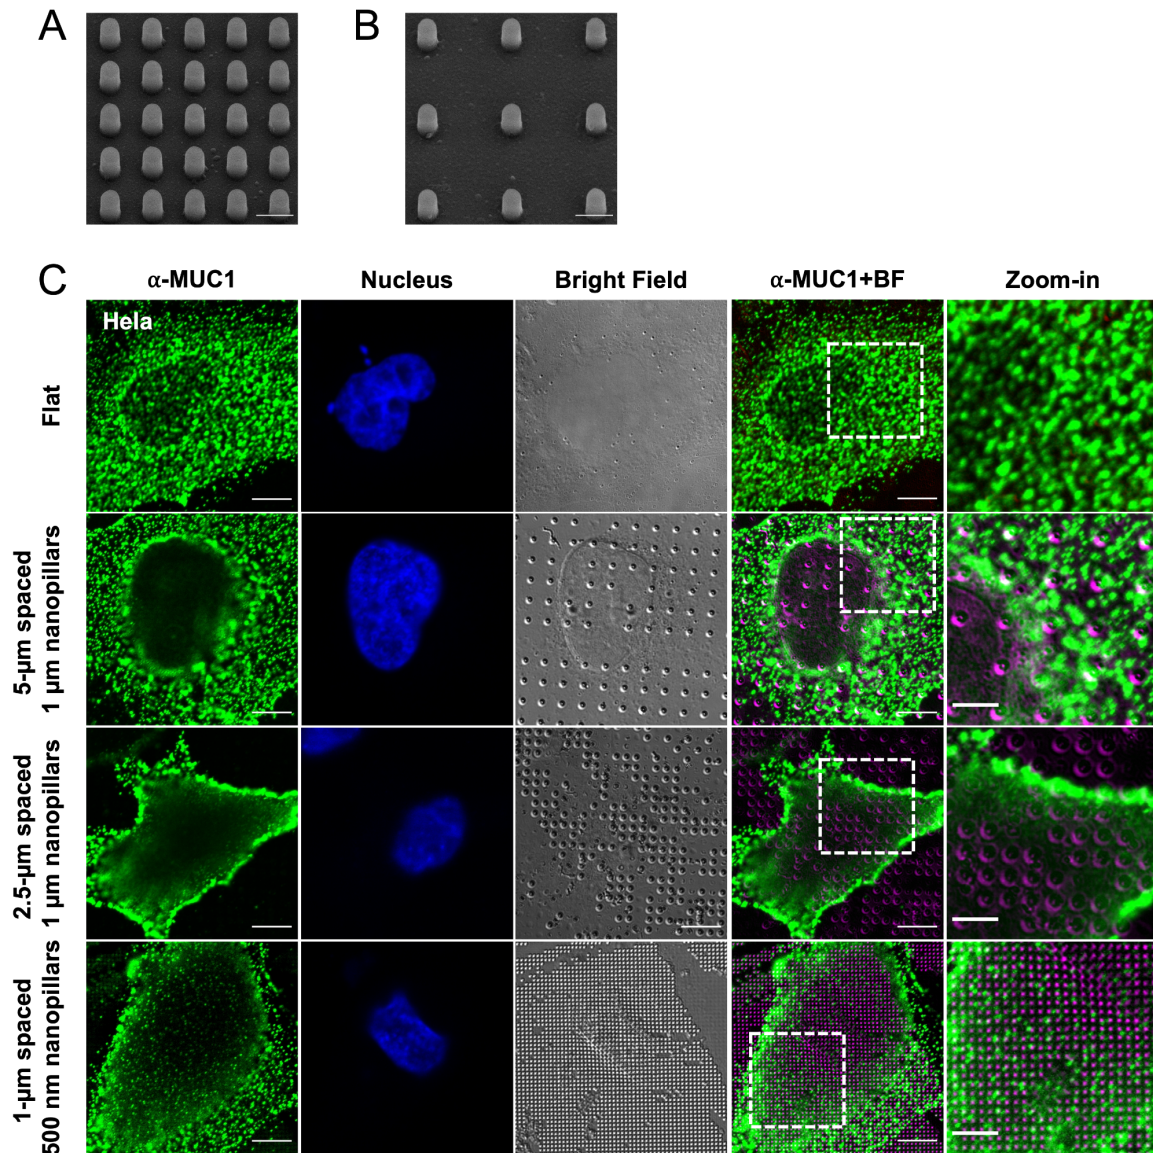

**Supplementary Figure 9. Confocal images of HeLa cells plated on the nanopillar substrates of various spacings.**

(A) A SEM image of the 1-µm-diameter, 1-µm-height, 2.5-µm-spaced nanopillar arrays. The images were taken with a stage tilt of 45°. Scale bar represents 2 µm. (B) A SEM image of the 1-µm-diameter, 1-µm-height, 5-µm-spaced nanopillar arrays. The images were taken with a stage tilt of 45°. Scale bar represents 2 µm. (C) Confocal images of HeLa cells plated on the nanopillar arrays of various spacings. MUC1 was immunostained with mouse anti-MUC1/episialin antibody (214D4) and fluorescently-labeled goat anti-mouse antibody, sequentially; Nuclei were visualized via Hoechst stain. Scale bars=10 µm for the whole-cell images; 5 µm for the zoom-in images. The bright field channel in the merge image is background-subtracted and converted into magenta color for visualization purposes.



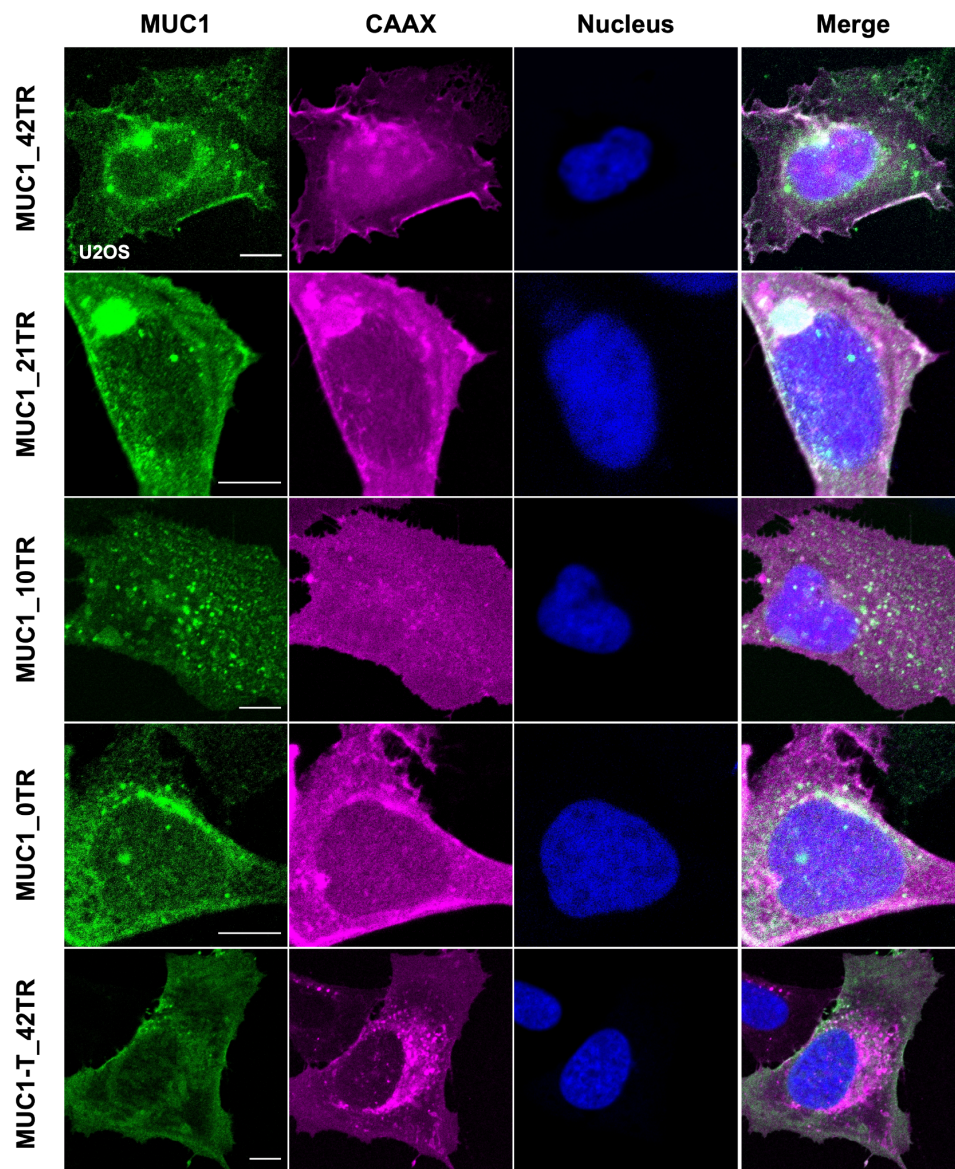

**Supplementary Figure 10. Co-transfection of MUC1- $\Delta$ CT-GFP of varying lengths and mCherry-CAAX in U2OS cells.**

Cells were all cultured on flat surfaces. Nuclei were visualized via Hoechst stain. Scale bars represent 10  $\mu$ m.



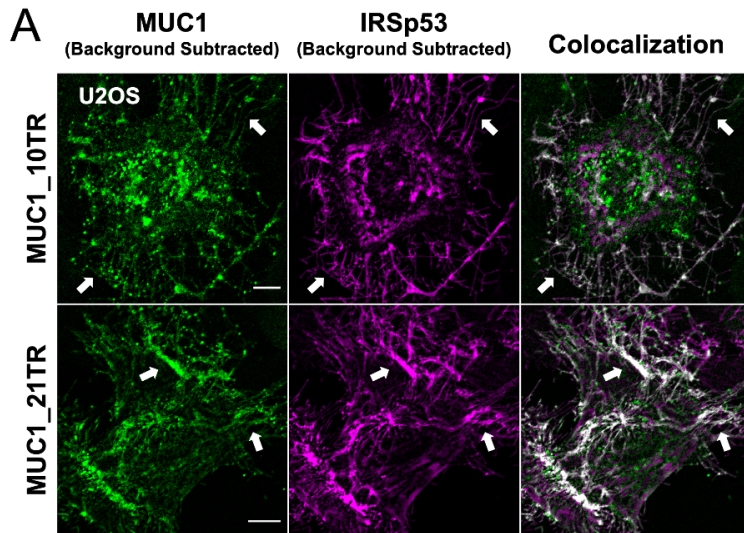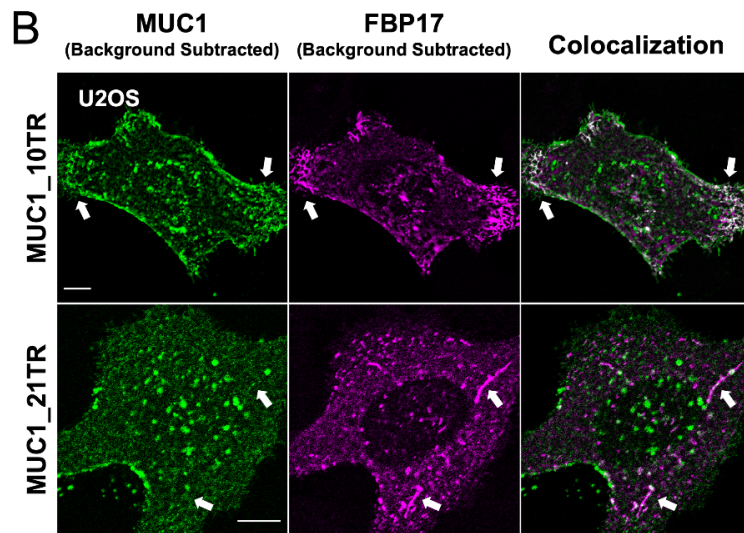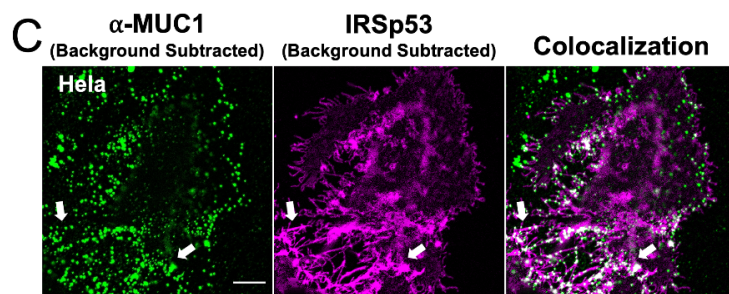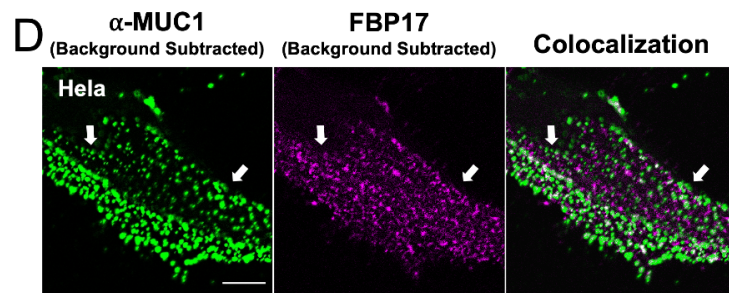

**Supplementary Figure 11. MUC1 avoids positively-curved membranes induced by membrane-sculpturing proteins.**

**(A-B)** Confocal images of U2OS cells transfected with either MUC1- $\Delta$ CT\_10TR-GFP or MUC1- $\Delta$ CT\_21TR-GFP and co-transfected with (A) IRSp53-mCherry to induce membrane protrusions with negative curvature; or (B) mCherry-FBP17- $\Delta$ SH3 to generate membrane invaginations with positive curvature. Scale bars represent 10  $\mu$ m. **(C-D)** MUC1 immunostaining on the (C) IRSp53-mCherry- (D) mCherry-FBP17- $\Delta$ SH3-transfected HeLa cells. Scale bars represent 10  $\mu$ m. In (C) and (D), MUC1 was immunostained with mouse anti-MUC1/episialin antibody (214D4) and fluorescently-labeled goat anti-mouse antibody, sequentially. All cells were cultured on flat surfaces. Arrows were drawn for guidance purposes.

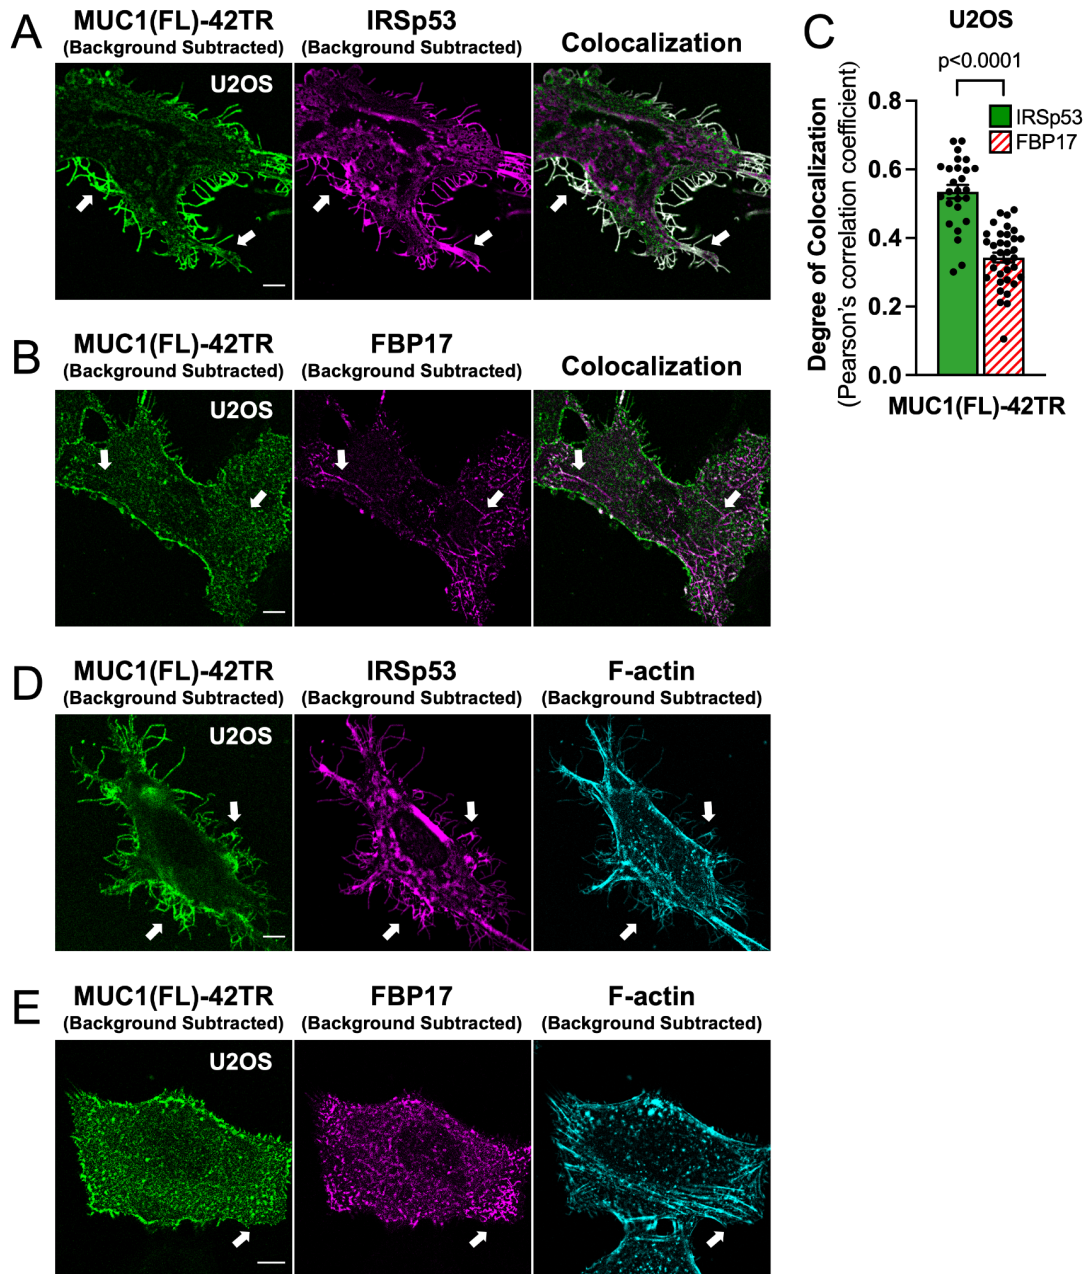

**Supplementary Figure 12. Full-length MUC1 also avoids positively-curved membranes and prefers negatively-curved ones induced by membrane-sculpturing proteins.**

(A-B) Confocal images of U2OS cells transfected with MUC1(FL)<sub>42TR</sub>-GFP and co-transfected with (A) IRSp53-mCherry to induce membrane protrusions with negative curvature; or (B) mCherry-FBP17-ΔSH3 to generate membrane invaginations with positive curvature. Scale bars represent 10 μm. (C) Colocalization analysis of MUC1(FL)<sub>42TR</sub>-GFP and two mCherry-BAR-family proteins in U2OS cells (see Supplementary Table 4D for the detailed statistics). Arrows were drawn for guidance purposes. (D-E) Confocal images of U2OS cells co-transfected with (D) MUC1(FL)<sub>42TR</sub>-GFP and IRSp53-mCherry or (E) MUC1(FL)<sub>42TR</sub>-GFP and mCherry-FBP17-ΔSH3 and stained with phalloidin to visualize F-actin. Scale bars represent 10 μm. All cells were cultured on flat surfaces. Welch's t tests (unpaired, two-tailed, not assuming equal variance) are applied for all statistical analyses in this figure. Error bars represent SEM. Arrows were drawn for guidance purposes.

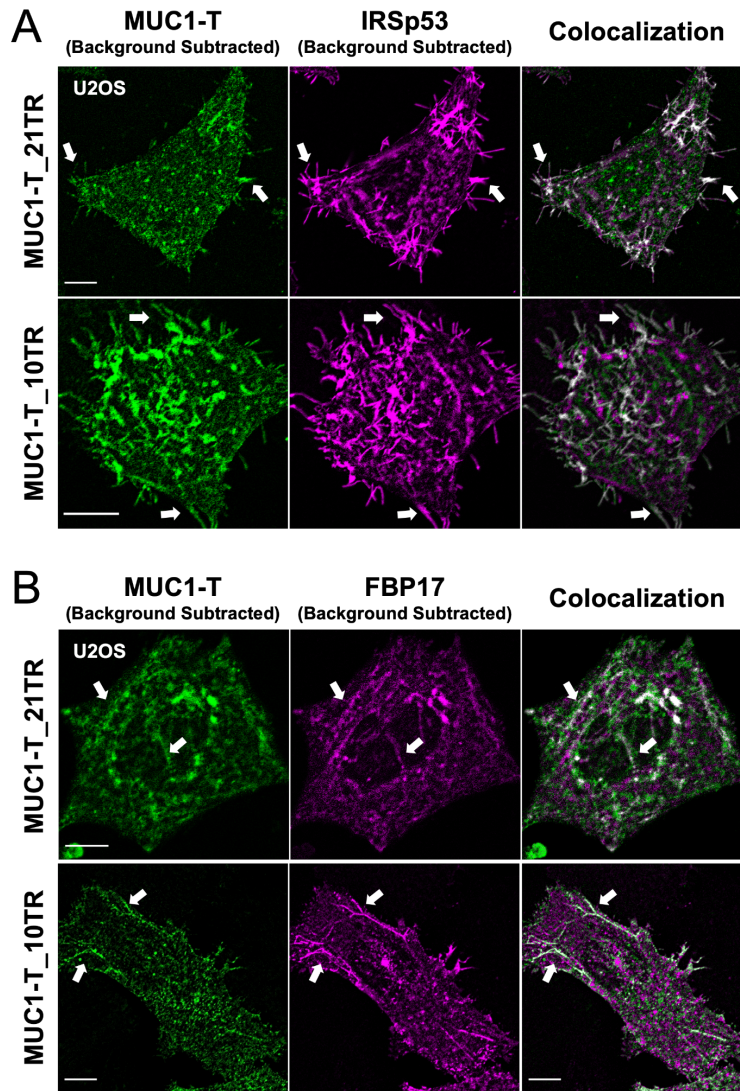

**Supplementary Figure 13. Reduced glycosylation of MUC1 causes reduced sensitivity toward curvatures induced by membrane-sculpting proteins.**

**(A)** Confocal images of U2OS cells co-transfected with IRSp53-mCherry and either MUC1- $\Delta$ CT-T<sub>10TR</sub>-GFP or MUC1- $\Delta$ CT-T<sub>21TR</sub>-GFP. Scale bars represent 10  $\mu$ m. **(B)** Confocal images of U2OS cells co-transfected with mCherry-FBP17- $\Delta$ SH3 and either either MUC1- $\Delta$ CT-T<sub>10TR</sub>-GFP or MUC1- $\Delta$ CT-T<sub>21TR</sub>-GFP. Scale bars represent 10  $\mu$ m. All cells were cultured on the flat surface. Arrows were drawn for guidance purposes.



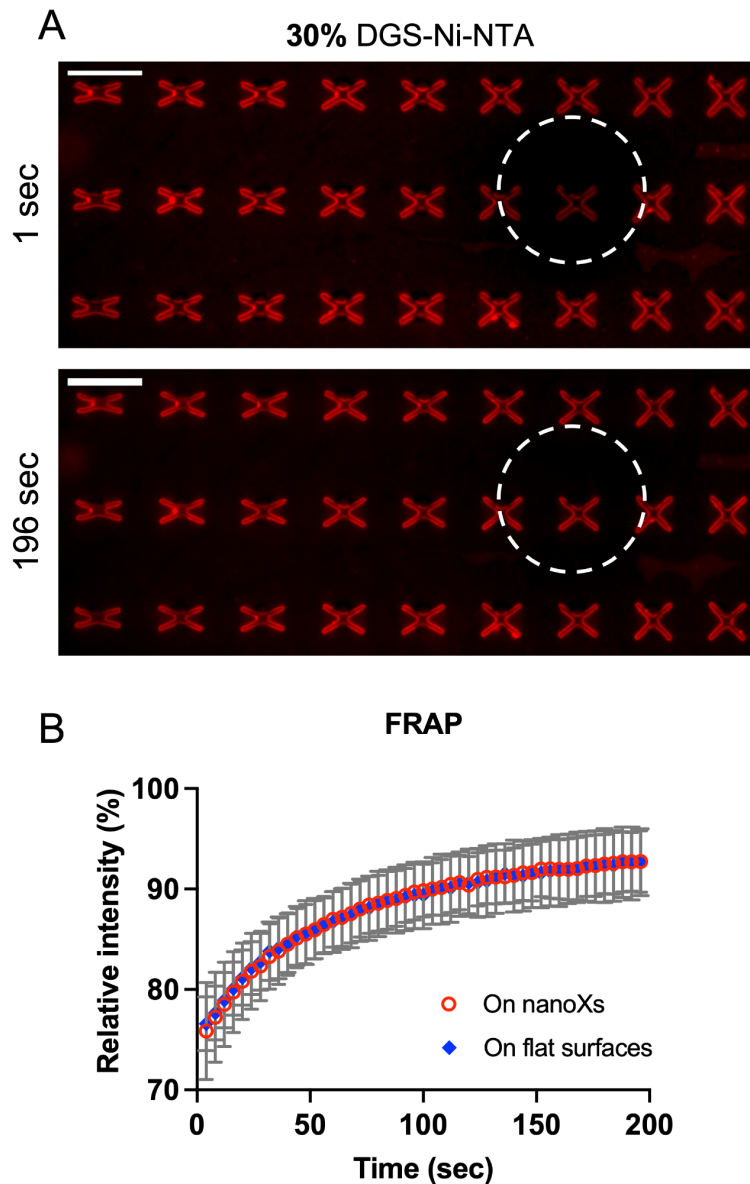

**Supplementary Figure 14. Lipid bilayer fluidity on the gradient nanoX arrays was measured by Fluorescence Recovery After Photobleaching (FRAP) assay (SLB experiments).**

**(A)** Fluorescence images of the lipid bilayers on the gradient nanoX arrays at 1 sec and 196 sec after photobleaching. The bilayers were doped with 30% DGS-Ni-NTA and ~1 mol.% of Texas Red-tagged DHPE for visualization. White-dashed circles indicate the bleached regions. **(B)** A plot of the time trace of fluorescence recovery signals shows that the lipid fluidity on nanoXs is comparable to that on flat surfaces. Each data point is averaged from 5 fields of view. Error bars represent SD.

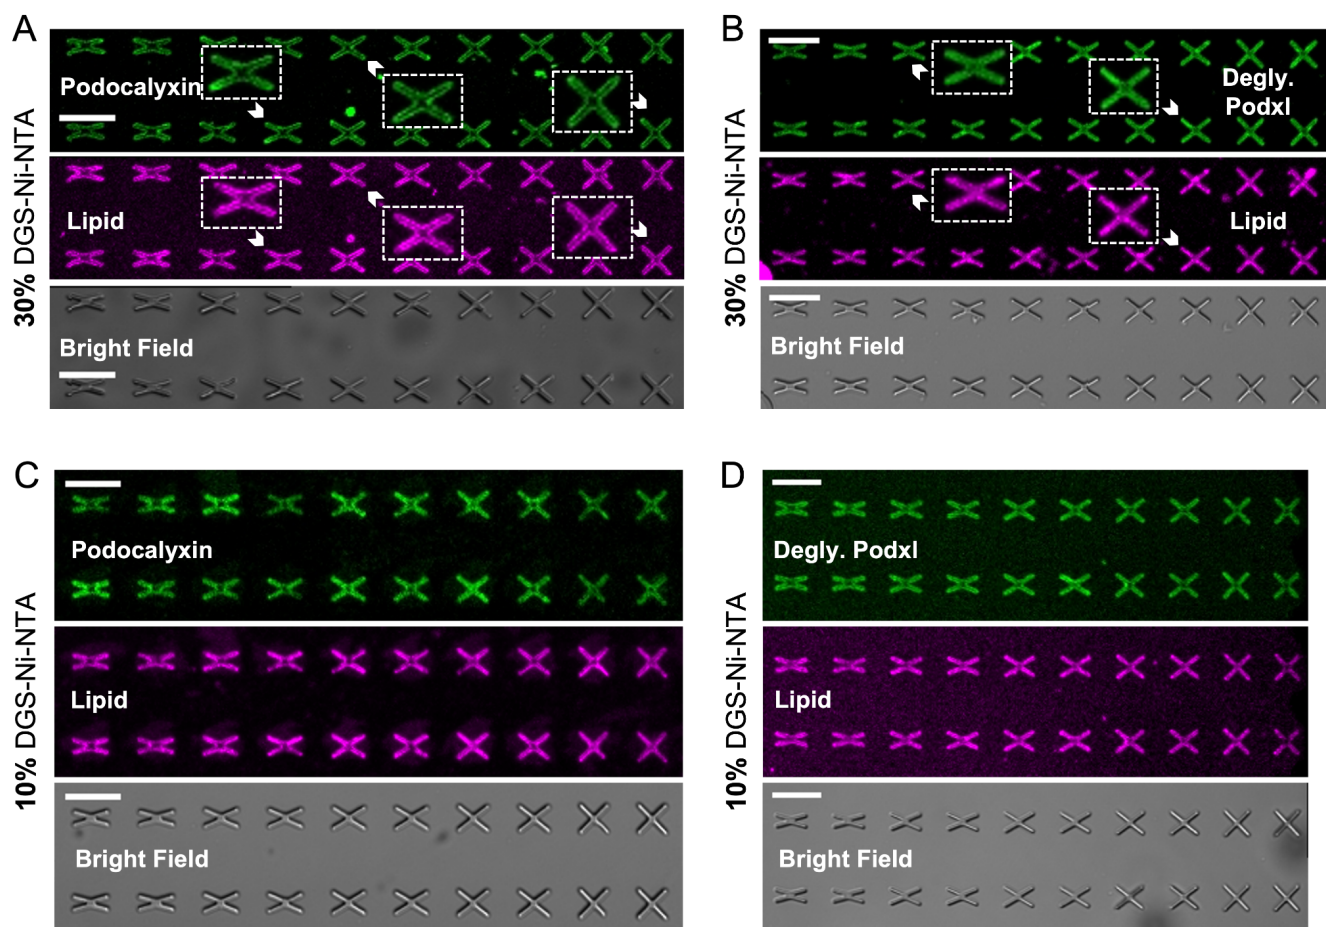

**Supplementary Figure 15. Confocal images of fluorescently-labeled Podocalyxin and deglycosylated Podocalyxin on the SLB-coated gradient nanoX arrays doped with 10% DGS-Ni-NTA.**

**(A-B)** Confocal images of fluorescently-labeled (A) Podocalyxin (Podxl) and (B) deglycosylated Podocalyxin on the SLB-coated gradient nanoX arrays. The lipid mixture was doped with 30% DGS-Ni-NTA and ~1 mol.% of Texas Red-tagged DHPE as a lipid bilayer marker. The inner angle of nanoX ranges from 30° (left) to 90° (right). All nanoX are 350 nm in width, 2 μm in height and 10 μm in spacing. NanoX inner angle ( $\theta$ ) increment: 15°. Scale bars represent 10 μm. **(C-D)** Confocal images of fluorescently-labeled (C) Podxl and (D) deglycosylated Podxl on the SLB-coated gradient nanoX arrays. The lipid mixture was doped with 10% DGS-Ni-NTA and ~1 mol.% of Texas Red-tagged DHPE as a lipid bilayer marker. Scale bars represent 10 μm.

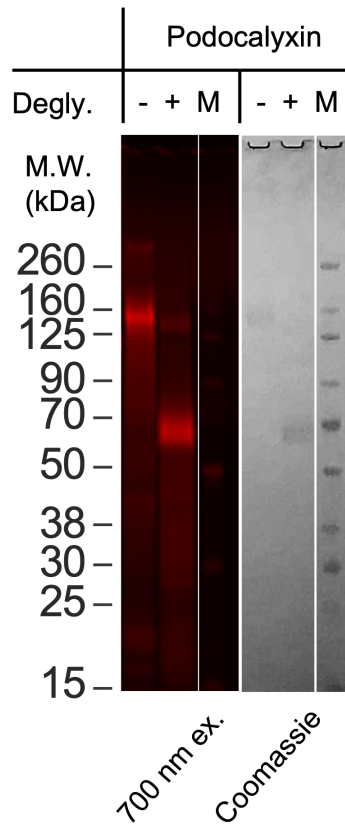

**Supplementary Figure 16. Polyacrylamide gel images of native and deglycosylated recombinant Podocalyxin protein with a His-tag.**

The protein was labeled with Alexa Fluor 647. The imaging was resolved at the excitation wavelength of 700 nm. The uncut gels are provided in the Source Data. (Abbreviations: 'M.W.' for molecular weight; 'M' for markers)

U2OS - mCherry-CAAX on gradient nanobars

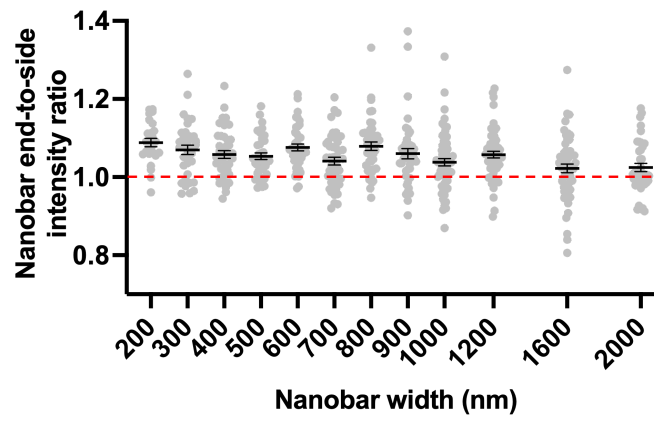

Supplementary Figure 17. Quantification of mCherry-CAAX signals in U2OS cells cultured on the gradient nanobar arrays. Error bars represent SEM.



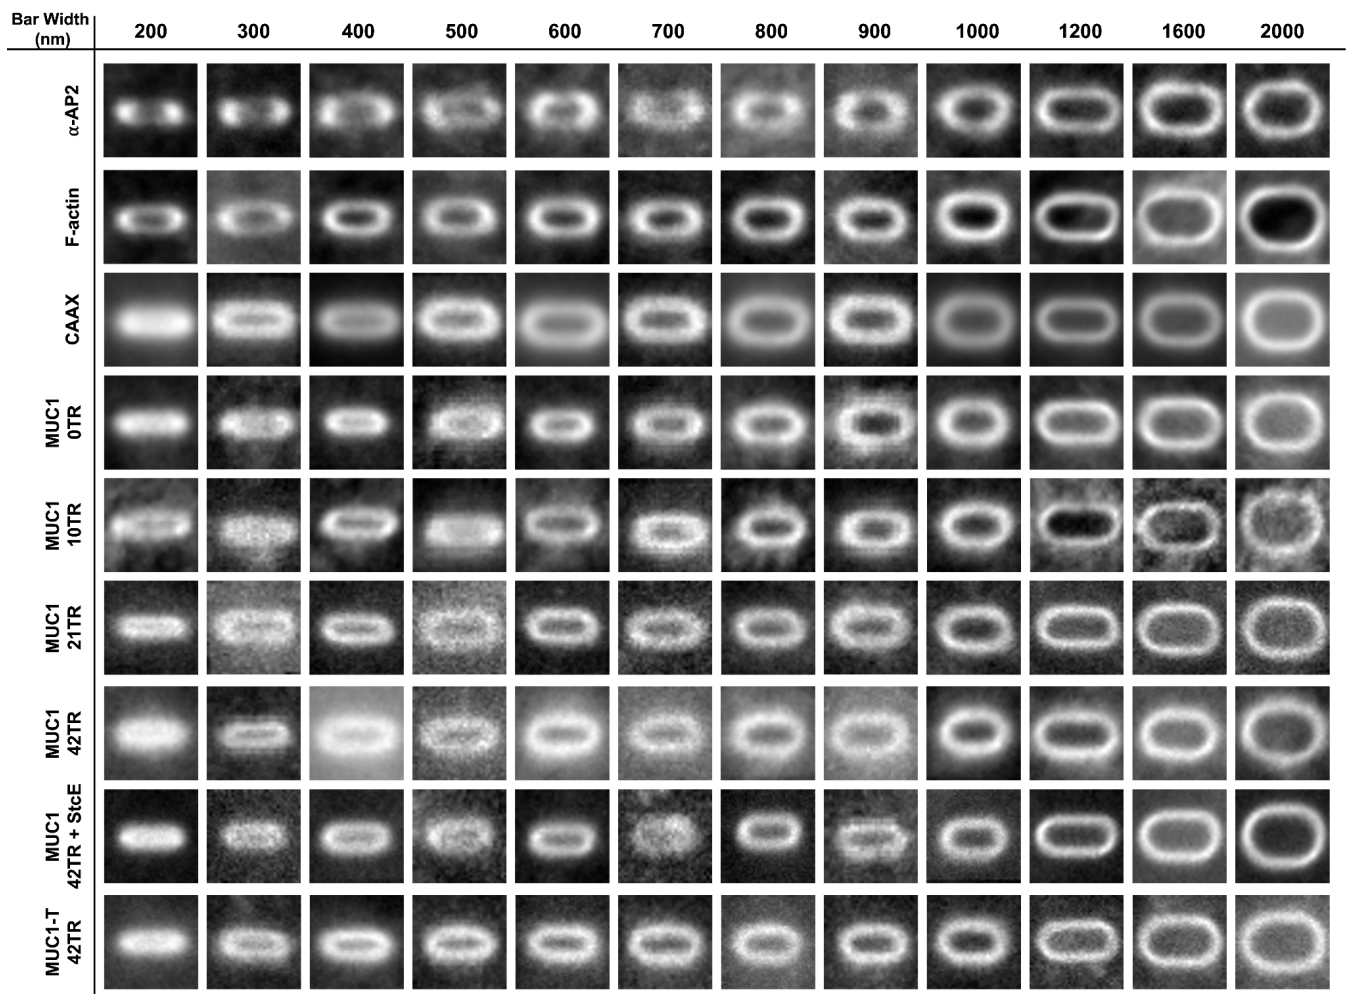

Supplementary Figure 18. Averaged fluorescence images of  $\alpha$ -AP2, F-actin, mCherry-CAAX and 6 different MUC1- $\Delta$ CT-GFP signals in U2OS cells plated on the gradient nanobar arrays.

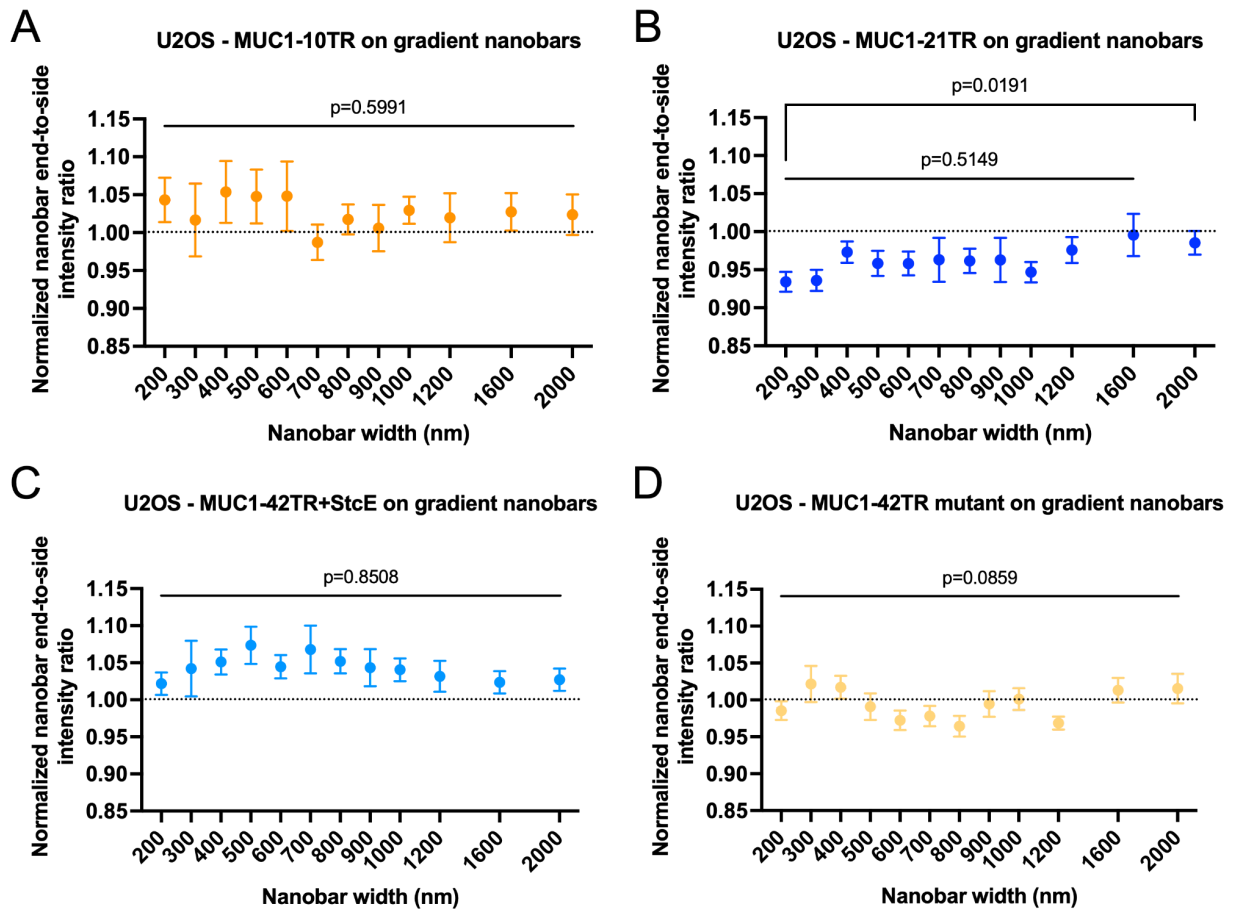

**Supplementary Figure 19. Quantification of MUC1- $\Delta$ CT-GFP signals in U2OS cells cultured on the gradient nanobar arrays.**

Quantification of **(A)** MUC1- $\Delta$ CT<sub>10TR</sub>-GFP, **(B)** MUC1- $\Delta$ CT<sub>21TR</sub>-GFP, **(C)** StcE-treated MUC1- $\Delta$ CT<sub>42TR</sub>-GFP and **(D)** MUC1- $\Delta$ CT<sub>42TR</sub>-GFP triple mutants on the gradient nanobar arrays. All ratios have been normalized against mCherry-CAAX signals (see Supplementary Table 7 for the detailed statistics). Both Welch's t tests (unpaired, two-tailed, not assuming equal variance) and one-way Welch's ANOVA are applied for the statistical analyses in this figure. Error bars represent SEM.
